# Supplementary material
Source: PubMed Central journal article supplement (PMC3443556)
Supplement: NIHMS331885-supplement-1.pdf [file NIHMS331885-supplement-1.pdf]

**Clinical Findings and Pain Symptoms as Potential Risk Factors for Chronic TMJD:**

**Descriptive Data and Empirically Identified Domains**

**from the OPPERA Case-Control Study**

Richard Ohrbach and OPPERA co-authors

Appendix A. OPPERA instruments:

self-administered questionnaires and examiner data collection instruments

Date filled out (mm-dd-yyyy)

# APM OPPERA

RESPONDENT ID LABEL

|  |  |   |  |  |   |  |  |  |  |
|--|--|---|--|--|---|--|--|--|--|
|  |  | - |  |  | - |  |  |  |  |
|--|--|---|--|--|---|--|--|--|--|

**Site Examiner/Technician:** Prior to the RDC/TMJ Exam, please complete the following measurements.

1. Participant's height

|  |  |      |  |  |        |
|--|--|------|--|--|--------|
|  |  | Feet |  |  | Inches |
|--|--|------|--|--|--------|

2. Participant's weight

|  |  |  |  |   |  |  |     |
|--|--|--|--|---|--|--|-----|
|  |  |  |  | · |  |  | lbs |
|--|--|--|--|---|--|--|-----|

3. Participant's blood pressure

|  |  |  |  |     |  |  |  |  |     |
|--|--|--|--|-----|--|--|--|--|-----|
|  |  |  |  | SBP |  |  |  |  | DBP |
|--|--|--|--|-----|--|--|--|--|-----|

4. Please make a photocopy of the participant's right and left hands.

A. Right Hand Measurement #1

Right Hand Measurement #2

Index finger 

|  |  |
|--|--|
|  |  |
|--|--|

 · 

|  |  |
|--|--|
|  |  |
|--|--|

 mm

Index finger 

|  |  |
|--|--|
|  |  |
|--|--|

 · 

|  |  |
|--|--|
|  |  |
|--|--|

 mm

Ring finger 

|  |  |
|--|--|
|  |  |
|--|--|

 · 

|  |  |
|--|--|
|  |  |
|--|--|

 mm

Ring finger 

|  |  |
|--|--|
|  |  |
|--|--|

 · 

|  |  |
|--|--|
|  |  |
|--|--|

 mm

B. Left Hand Measurement #1

Left Hand Measurement #2

Index finger 

|  |  |
|--|--|
|  |  |
|--|--|

 · 

|  |  |
|--|--|
|  |  |
|--|--|

 mm

Index finger 

|  |  |
|--|--|
|  |  |
|--|--|

 · 

|  |  |
|--|--|
|  |  |
|--|--|

 mm

Ring finger 

|  |  |
|--|--|
|  |  |
|--|--|

 · 

|  |  |
|--|--|
|  |  |
|--|--|

 mm

Ring finger 

|  |  |
|--|--|
|  |  |
|--|--|

 · 

|  |  |
|--|--|
|  |  |
|--|--|

 mm

Date filled out (mm-dd-yyyy)

CPSQ OPPERA

RESPONDENT ID LABEL

MM - DD - YYYY

The following questions are about pain and other symptoms in your face. For our purposes, the face refers to your temples, cheeks, jaw muscles, ears, or jaw joints. Jaw joints means the part of your jaw in front of your ear that moves when you open and close your mouth.

Mark (X) one response for each item and do not skip any items unless instructed to do so. If you change your mind, fill the incorrect mark completely and then mark (X) the new response.

1. In the last month, have you had any of the symptoms listed below in your face or jaw?

Table with 2 columns: Yes, No. Rows: A. Stiffness or tightness, B. Cramping, C. Fatigue, D. Pressure, E. Soreness or tenderness, F. Ache, or dull ache.

2. Have you ever had pain in your face, jaw, temple, in front of the ear, or in the ear, not including toothache or ear infection?

Yes No IF "NO" SKIP TO 16

A. How many years or months ago did your facial pain begin?

YEARS MONTHS

3. How would you describe the duration of your facial pain (e.g., how long you have had your pain)?

- Persistent -- continuous pain since initial onset
Recurrent -- more than one bout of pain, with periods of no pain
One-time -- a prior episode of pain that has ended

4. Have you ever gone to a physician, dentist, chiropractor, or other health professional for a facial ache or pain?

Yes No IF "NO" SKIP TO 5

A. How long ago was your most recent visit for facial ache or pain?

- Within 1 to 6 months More than 6 months ago Don't Know

5. Have you had this facial ache or pain in the last month?

Yes No IF "NO" SKIP TO 9

6. In the last month, on the average, how often did you have pain in the face or jaw?

- Rarely Less than half the days Half or more than half the days but not daily Daily

7. In the last month, on the average, how long did each episode of pain in your face or jaw last?

- Less than 1 minute 1 minute to 1 day More than 1 day to 1 week More than 1 week but not constant Constant

8. In the last month, did any of the following activities change your face or jaw muscle pain?

Please mark (X) one response for each activity.

Table with 3 columns: Pain got worse, Pain did not change, Pain improved. Rows: A. Opening your mouth..., B. Chewing hard..., C. Jaw habits..., D. Resting the jaw, E. Other jaw activities...

For the next three questions, please rate on a scale from 0 to 10, where 0 is "No pain" and 10 is "Pain as bad as it could be".

No Pain 0 1 2 3 4 5 6 7 8 9 10 Pain as bad as it could be

9. How would you rate your facial pain at the present time, that is right now?

Scale 0-10

10. In the past 6 months, how intense was your worst facial pain?

Scale 0-10

11. In the past 6 months, on the average, how intense was your facial pain?

Scale 0-10

Mark (☒) one response for each item and do not skip any items unless instructed to do so. If you change your mind, fill the incorrect mark completely and then mark (☒) the new response.

12. Approximately how many days **in the past 6 months** have you been kept from your usual activities (work, school, or housework) because of **facial** pain? If every day, please write in 180.  # of days

A. In the past 6 months, how many days has your efficiency dropped below 50% of what you consider "normal" for you because of **facial** pain? If every day, please write in 180.  # of days

For the next three questions, please rate on a scale from 0 to 10, where 0 is "No interference" and 10 is "Unable to carry on any activities". In the past 6 months, how much has your **facial** pain interfered with your:

| No interference | 0 | 1 | 2 | 3 | 4 | 5 | 6 | 7 | 8 | 9 | 10 | Unable to carry on any activities |
|-----------------|---|---|---|---|---|---|---|---|---|---|----|-----------------------------------|
|-----------------|---|---|---|---|---|---|---|---|---|---|----|-----------------------------------|

|                                                                         |                          |                          |                          |                          |                          |                          |                          |                          |                          |                          |                          |
|-------------------------------------------------------------------------|--------------------------|--------------------------|--------------------------|--------------------------|--------------------------|--------------------------|--------------------------|--------------------------|--------------------------|--------------------------|--------------------------|
| 13. daily activities?                                                   | <input type="checkbox"/> |
| 14. ability to take part in recreational, social and family activities? | <input type="checkbox"/> |
| 15. ability to work (including housework)?                              | <input type="checkbox"/> |

16. Have you been told, or do you notice, that you grind your teeth or clench your jaw while sleeping at night?

A. Does your jaw ache or feel stiff when you wake in the morning?

| Yes                      | No                       |
|--------------------------|--------------------------|
| <input type="checkbox"/> | <input type="checkbox"/> |
| <input type="checkbox"/> | <input type="checkbox"/> |

17. **In the last month**, did you have any of the following jaw joint noises on the **left side** of your face when you moved your jaw?

| Left jaw joint:                          | Yes                      | No                       |
|------------------------------------------|--------------------------|--------------------------|
| A. Clicking, popping, or snapping noises | <input type="checkbox"/> | <input type="checkbox"/> |
| B. Crunching or grating noises           | <input type="checkbox"/> | <input type="checkbox"/> |
| C. Other noises                          | <input type="checkbox"/> | <input type="checkbox"/> |

If you selected no noises at all for your left jaw joint, skip to question 18.

|                                                                                                       | Yes                      | No                       |
|-------------------------------------------------------------------------------------------------------|--------------------------|--------------------------|
| D. In the last month, when you had <b>left</b> jaw joint noises, did pain occur with the joint noise? | <input type="checkbox"/> | <input type="checkbox"/> |

18. In the last month, did you have any of the following jaw joint noises on the **right side** of your face when you moved your jaw?

| Right jaw joint:                         | Yes                      | No                       |
|------------------------------------------|--------------------------|--------------------------|
| A. Clicking, popping, or snapping noises | <input type="checkbox"/> | <input type="checkbox"/> |
| B. Crunching or grating noises           | <input type="checkbox"/> | <input type="checkbox"/> |
| C. Other noises                          | <input type="checkbox"/> | <input type="checkbox"/> |

If you selected no noises at all for your right jaw joint, skip to question 19.

|                                                                                                        | Yes                      | No                       |
|--------------------------------------------------------------------------------------------------------|--------------------------|--------------------------|
| D. In the last month, when you had <b>right</b> jaw joint noises, did pain occur with the joint noise? | <input type="checkbox"/> | <input type="checkbox"/> |

19. **Prior to a month ago**, did you have any of the following jaw joint noises in either or both of your jaw joints when you moved your jaw?

|                                          | Yes                      | No                       |
|------------------------------------------|--------------------------|--------------------------|
| A. Clicking, popping, or snapping noises | <input type="checkbox"/> | <input type="checkbox"/> |
| B. Crunching or grating noises           | <input type="checkbox"/> | <input type="checkbox"/> |
| C. Other noises                          | <input type="checkbox"/> | <input type="checkbox"/> |

20. **In the last month**, did you avoid opening your mouth wide because of **pain**?

| Yes                      | No                       |
|--------------------------|--------------------------|
| <input type="checkbox"/> | <input type="checkbox"/> |

21. In the last month, regardless of pain, was there a time when you could **not** open your mouth wide even for a moment?

| Yes                      | No                       |
|--------------------------|--------------------------|
| <input type="checkbox"/> | <input type="checkbox"/> |

If answered "No" to question 21 skip to question 24.

Mark (☒) one response for each item and do not skip any items unless instructed to do so. If you change your mind, fill the incorrect mark completely and then mark (☒) the new response.

22. In the last month, what was the longest amount of time that you could **not** open your mouth wide? Please mark (☒) only one response.
- Seconds to a minute
  - Minutes to an hour
  - Hours to a day
  - Days to a week
  - Longer than a week but not constant
  - Constant

23. In the last month, was the problem with opening your mouth wide due to **locking or catching** (that is, being stuck) in your jaw joint(s)?

- |                          |                          |
|--------------------------|--------------------------|
| <b>Yes</b>               | <b>No</b>                |
| <input type="checkbox"/> | <input type="checkbox"/> |

24. **Prior to one month ago**, was there ever a time when you avoided opening your mouth wide because of pain?

- |                          |                          |
|--------------------------|--------------------------|
| <input type="checkbox"/> | <input type="checkbox"/> |
|--------------------------|--------------------------|

25. Prior to one month ago, regardless of pain, was there a time when you could **not** open your mouth wide even for a moment?

- |                          |                          |
|--------------------------|--------------------------|
| <input type="checkbox"/> | <input type="checkbox"/> |
|--------------------------|--------------------------|

If answered "No" to question 25 skip to question 27.

26. Prior to one month ago, was the problem with opening your mouth wide due to **locking or catching** (that is, being stuck) in your jaw joint(s)?

- |                          |                          |
|--------------------------|--------------------------|
| <b>Yes</b>               | <b>No</b>                |
| <input type="checkbox"/> | <input type="checkbox"/> |

27. **In the last month**, when you opened your mouth wide, did your jaw **lock or catch** even for a moment so that you **could not close it** from this wide open position?

- |                          |                          |
|--------------------------|--------------------------|
| <input type="checkbox"/> | <input type="checkbox"/> |
|--------------------------|--------------------------|

If answered "No" to question 27 skip to question 30.

28. In the last month, when your jaw locked or caught wide open, did you have to do something to get it to close including moving, pushing, or maneuvering it?

- |                          |                          |
|--------------------------|--------------------------|
| <b>Yes</b>               | <b>No</b>                |
| <input type="checkbox"/> | <input type="checkbox"/> |

29. In the last month, what was the **longest** amount of time that your jaw locked or caught when you opened wide? Please mark (☒) only one response.
- Seconds to a minute
  - Minutes to an hour
  - Hours to a day
  - Days to a week
  - Longer than a week but not constant
  - Constant

30. **Prior to one month ago**, when you opened your mouth wide, did your jaw **lock or catch** even for a moment so that you **could not close it** from this wide open position?

- |                          |                          |
|--------------------------|--------------------------|
| <b>Yes</b>               | <b>No</b>                |
| <input type="checkbox"/> | <input type="checkbox"/> |

If answered "No" to question 30 skip to question 32.

31. Prior to one month ago, how many times did your jaw lock or catch even for a moment so that you **could not close your mouth** from this wide open position?
- 1-2 times
  - More than 2 times

32. **In the last month**, when you closed your mouth all the way, was there a time when your teeth did not fit together in your usual bite?

- |                          |                          |
|--------------------------|--------------------------|
| <b>Yes</b>               | <b>No</b>                |
| <input type="checkbox"/> | <input type="checkbox"/> |

33. **In your lifetime**, have you experienced any of the following? Mark (☒) all that apply.
- Wisdom tooth extraction or other dental treatment
  - Oral intubation (that is, general anesthesia with placement of a tube through your mouth)
  - Significant bump to the jaw (including fall, blow, sports injury)
  - Motor vehicle accident
  - Accident resulting in whiplash
  - Injury to your shoulder(s) or neck
  - Other injury affecting the head. Please specify: \_\_\_\_\_
  - None of the above

If you answered "none of the above" to question 33, skip to question 34.

- 33a. In your lifetime, did any of the preceding events cause injury to the jaw?  Yes  No  Don't know

Mark (☒) one response for each item and do not skip any items unless instructed to do so. If you change your mind, fill the incorrect mark completely and then mark (☒) the new response.

34. In your lifetime, have you been injured from either of the following.  During yawning  
 Mark (☒) all that apply.  Prolonged mouth opening

35. Have you had orthodontic procedures (i.e., braces)? **Yes**  **No**

36. **In the past year**, have you had any headaches? **Yes**  **No**

If answered "No" to question 36 skip to question 42.

37. **In the last 30 days**, how many headaches of any type have you had?    Number of headaches  
 Don't know

38. **In the past year**, how many different types of headaches have you had (e.g., stress or tension-type, migraine, hunger headache, sinus headache)?  1  2  3  4 or more

39. **Headache #1 (most frequent headache):** Where is the pain? Please mark (☒) all that apply.  
 Temple  
 Forehead  
 Top of head  
 Back of the head  
 Behind the eye or inside the head

A. What is the typical intensity of this type of headache?  Mostly mild, ranging to moderate  Mostly severe, at times moderate

B. Please indicate the characteristics of this type of headache. Please mark (☒) all that apply.  
 Pain is on both sides of the head  
 Pain is pressing or tightening  
 Pain is throbbing or pulsating  
 Pain made worse by routine physical activity such as walking or climbing stairs  
 Mild nausea or sick to stomach  
 Moderate or severe nausea or sick to stomach  
 Vomiting  
 Light is more bothersome than usual  
 Sound is more bothersome than usual

C. How many years have you had this type of headache?   years

D. In the past year, how many months have you had this type of headache?   months

E. In the past year, on average, how many **days per month** have you had this type of headache?  
 Less than 1 day per month  
 1 day or more, but less than 15 days per month  
 15 days or more per month

F. In the past year, how many **episodes** of this type of headache have you had?  Less than 10 episodes  10 or more episodes

G. On average, how long does a single episode of this type of headache last?  
 Less than 30 minutes per episode  
 30 minutes to less than 2 hours per episode  
 2 hours to 7 days per episode  
 More than 7 days to continuous pain per episode

Mark (☒) one response for each item and do not skip any items unless instructed to do so. If you change your mind, fill the incorrect mark completely and then mark (☒) the new response.

39. **Headache #1 (most frequent headache):**

H. Do any of the following activities change this type of headache?  
Please mark (☒) one response for each activity.

|                                                                                         | Pain got worse           | Pain did not change      | Pain improved            |
|-----------------------------------------------------------------------------------------|--------------------------|--------------------------|--------------------------|
| 1. Opening your mouth or moving your jaw forward or to the side.                        | <input type="checkbox"/> | <input type="checkbox"/> | <input type="checkbox"/> |
| 2. Chewing hard or tough food.                                                          | <input type="checkbox"/> | <input type="checkbox"/> | <input type="checkbox"/> |
| 3. Jaw habits such as holding teeth together, clenching/grinding teeth, or chewing gum. | <input type="checkbox"/> | <input type="checkbox"/> | <input type="checkbox"/> |
| 4. Resting the jaw.                                                                     | <input type="checkbox"/> | <input type="checkbox"/> | <input type="checkbox"/> |
| 5. Other jaw activities such as talking, kissing, or yawning.                           | <input type="checkbox"/> | <input type="checkbox"/> | <input type="checkbox"/> |

If no second headache, skip to question 42.

40. **Headache #2 (second most frequent headache):**

Where is the pain? Please mark (☒) all that apply.

- Temple
- Forehead
- Top of head
- Back of the head
- Behind the eye or inside the head

A. What is the typical intensity of this type of headache?

- Mostly mild, ranging to moderate
- Mostly severe, at times moderate

B. Please indicate the characteristics of this type of headache. Please mark (☒) all that apply.

- Pain is on both sides of the head
- Pain is pressing or tightening
- Pain is throbbing or pulsating
- Pain made worse by routine physical activity such as walking or climbing stairs
- Mild nausea or sick to stomach
- Moderate or severe nausea or sick to stomach
- Vomiting
- Light is more bothersome than usual
- Sound is more bothersome than usual

C. How many years have you had this type of headache?

years

D. In the past year, how many months have you had this type of headache?

months

E. In the past year, on average, how many **days per month** have you had this type of headache?

- Less than 1 day per month
- 1 day or more, but less than 15 days per month
- 15 days or more per month

F. In the past year, how many **episodes** of this type of headache have you had?

- Less than 10 episodes
- 10 or more episodes

G. On average, how long does a single episode of this type of headache last?

- Less than 30 minutes per episode
- 30 minutes to less than 2 hours per episode
- 2 hours to 7 days per episode
- More than 7 days to continuous pain per episode

Mark (☒) one response for each item and do not skip any items unless instructed to do so. If you change your mind, fill the incorrect mark completely and then mark (☒) the new response.

40. **Headache #2 (second most frequent headache):**

| H. Do any of the following activities change this type of headache?<br>Please mark (☒) one response for each activity. | Pain got worse           | Pain did not change      | Pain improved            |
|------------------------------------------------------------------------------------------------------------------------|--------------------------|--------------------------|--------------------------|
| 1. Opening your mouth or moving your jaw forward or to the side.                                                       | <input type="checkbox"/> | <input type="checkbox"/> | <input type="checkbox"/> |
| 2. Chewing hard or tough food.                                                                                         | <input type="checkbox"/> | <input type="checkbox"/> | <input type="checkbox"/> |
| 3. Jaw habits such as holding teeth together, clenching/grinding teeth, or chewing gum.                                | <input type="checkbox"/> | <input type="checkbox"/> | <input type="checkbox"/> |
| 4. Resting the jaw.                                                                                                    | <input type="checkbox"/> | <input type="checkbox"/> | <input type="checkbox"/> |
| 5. Other jaw activities such as talking, kissing, or yawning.                                                          | <input type="checkbox"/> | <input type="checkbox"/> | <input type="checkbox"/> |

If no third headache, skip to question 42.

41. **Headache #3 (third most frequent headache):**

Where is the pain? Please mark (☒) all that apply.

- Temple
- Forehead
- Top of head
- Back of the head
- Behind the eye or inside the head

A. What is the typical intensity of this type of headache?  Mostly mild, ranging to moderate  Mostly severe, at times moderate

- B. Please indicate the characteristics of this type of headache. Please mark (☒) all that apply.
- Pain is on both sides of the head
  - Pain is pressing or tightening
  - Pain is throbbing or pulsating
  - Pain made worse by routine physical activity such as walking or climbing stairs
  - Mild nausea or sick to stomach
  - Moderate or severe nausea or sick to stomach
  - Vomiting
  - Light is more bothersome than usual
  - Sound is more bothersome than usual

C. How many years have you had this type of headache?   years

D. In the past year, how many months have you had this type of headache?   months

- E. In the past year, on average, how many **days per month** have you had this type of headache?
- Less than 1 day per month
  - 1 day or more, but less than 15 days per month
  - 15 days or more per month

F. In the past year, how many **episodes** of this type of headache have you had?  Less than 10 episodes  10 or more episodes

- G. On average, how long does a single episode of this type of headache last?
- Less than 30 minutes per episode
  - 30 minutes to less than 2 hours per episode
  - 2 hours to 7 days per episode
  - More than 7 days to continuous pain per episode



Mark (☒) one response for each item and do not skip any items unless instructed to do so. If you change your mind, fill the incorrect mark completely and then mark (☒) the new response.

41. **Headache #3 (third most frequent headache):**

H. Do any of the following activities change this type of headache?  
Please mark (☒) one response for each activity.

|                                                                                         | Pain got worse           | Pain did not change      | Pain improved            |
|-----------------------------------------------------------------------------------------|--------------------------|--------------------------|--------------------------|
| 1. Opening your mouth or moving your jaw forward or to the side.                        | <input type="checkbox"/> | <input type="checkbox"/> | <input type="checkbox"/> |
| 2. Chewing hard or tough food.                                                          | <input type="checkbox"/> | <input type="checkbox"/> | <input type="checkbox"/> |
| 3. Jaw habits such as holding teeth together, clenching/grinding teeth, or chewing gum. | <input type="checkbox"/> | <input type="checkbox"/> | <input type="checkbox"/> |
| 4. Resting the jaw.                                                                     | <input type="checkbox"/> | <input type="checkbox"/> | <input type="checkbox"/> |
| 5. Other jaw activities such as talking, kissing, or yawning.                           | <input type="checkbox"/> | <input type="checkbox"/> | <input type="checkbox"/> |

42. We are interested in other pains that lasted a whole day or more, or that occurred several times a year due to any cause, and which you still experience. Please do not report aches and pains that are fleeting or minor such as a brief headache or sore muscles after exercising. Do you have a **persistent or chronic pain** in areas **other** than the face?

Yes  No

If answered "No" to question 42 skip to question 50.

For the next three questions, please rate on a scale from 0 to 10, where 0 is "No pain" and 10 is "Pain as bad as it could be".

No Pain 0 1 2 3 4 5 6 7 8 9 10 Pain as bad as it could be

|                                                                                               |                          |                          |                          |                          |                          |                          |                          |                          |                          |                          |                          |
|-----------------------------------------------------------------------------------------------|--------------------------|--------------------------|--------------------------|--------------------------|--------------------------|--------------------------|--------------------------|--------------------------|--------------------------|--------------------------|--------------------------|
| 43. How would you rate your <b>other</b> pain at the present time, that is <b>right now</b> ? | <input type="checkbox"/> |
| 44. <b>In the past 6 months</b> , how intense was your <b>worst other pain</b> ?              | <input type="checkbox"/> |
| 45. In the past 6 months, on the average, how intense was your <b>other</b> pain?             | <input type="checkbox"/> |

46. Approximately how many days in the past 6 months have you been kept from your usual activities (work, school, or housework) because of your other pain? If every day please write in 180.

# of days

For the next three questions, please rate on a scale from 0 to 10, where 0 is "No interference" and 10 is "Unable to carry on any activities." In the past 6 months, how much has your **other** pain interfered with your:

No interference 0 1 2 3 4 5 6 7 8 9 10 Unable to carry on any activities

|                                                                         |                          |                          |                          |                          |                          |                          |                          |                          |                          |                          |                          |
|-------------------------------------------------------------------------|--------------------------|--------------------------|--------------------------|--------------------------|--------------------------|--------------------------|--------------------------|--------------------------|--------------------------|--------------------------|--------------------------|
| 47. daily activities?                                                   | <input type="checkbox"/> |
| 48. ability to take part in recreational, social and family activities? | <input type="checkbox"/> |
| 49. ability to work (including housework)?                              | <input type="checkbox"/> |

Mark (☒) one response for each item and do not skip any items unless instructed to do so. If you change your mind, fill the incorrect mark completely and then mark (☒) the new response.

50. Do you have any of the following conditions or symptoms?

|                                               | Yes                      | No                       |
|-----------------------------------------------|--------------------------|--------------------------|
| A. Joint disease, arthritis                   | <input type="checkbox"/> | <input type="checkbox"/> |
| B. Fibromyalgia                               | <input type="checkbox"/> | <input type="checkbox"/> |
| C. Chronic Fatigue Syndrome                   | <input type="checkbox"/> | <input type="checkbox"/> |
| D. Irritable Bowel Syndrome                   | <input type="checkbox"/> | <input type="checkbox"/> |
| E. A tendency to faint                        | <input type="checkbox"/> | <input type="checkbox"/> |
| F. Ringing in your ears                       | <input type="checkbox"/> | <input type="checkbox"/> |
| G. Periodic heart racing or pounding          | <input type="checkbox"/> | <input type="checkbox"/> |
| H. Repeated trouble with neck, back, or spine | <input type="checkbox"/> | <input type="checkbox"/> |
| I. Insomnia                                   | <input type="checkbox"/> | <input type="checkbox"/> |
| J. Depression                                 | <input type="checkbox"/> | <input type="checkbox"/> |
| K. Panic Disorder                             | <input type="checkbox"/> | <input type="checkbox"/> |
| L. Post-Traumatic Stress Disorder (PTSD)      | <input type="checkbox"/> | <input type="checkbox"/> |
| M. Anxiety Disorder                           | <input type="checkbox"/> | <input type="checkbox"/> |
| N. Acid Reflux                                | <input type="checkbox"/> | <input type="checkbox"/> |
| O. Interstitial Cystitis                      | <input type="checkbox"/> | <input type="checkbox"/> |
| P. Prostatitis                                | <input type="checkbox"/> | <input type="checkbox"/> |
| Q. Multiple Chemical Sensitivity              | <input type="checkbox"/> | <input type="checkbox"/> |
| R. Dysmenorrhea                               | <input type="checkbox"/> | <input type="checkbox"/> |
| S. Chronic Pelvic Pain                        | <input type="checkbox"/> | <input type="checkbox"/> |
| T. Sleep Apnea                                | <input type="checkbox"/> | <input type="checkbox"/> |
| U. Other (describe): <input type="text"/>     | <input type="checkbox"/> | <input type="checkbox"/> |

51. Have you ever experienced pain in your lower back?

Yes       No

If answered "No" to question 51 skip to question 52.

|                                                                                                                | Yes                                                                                                                                                                                                                     | No                                      |
|----------------------------------------------------------------------------------------------------------------|-------------------------------------------------------------------------------------------------------------------------------------------------------------------------------------------------------------------------|-----------------------------------------|
| A. Do you currently have low back pain?                                                                        | <input type="checkbox"/>                                                                                                                                                                                                | <input type="checkbox"/>                |
| B. Has your low back pain been constant or does it come and go?                                                | <input type="checkbox"/> Constant                                                                                                                                                                                       | <input type="checkbox"/> Comes and goes |
| C. How many episodes of low back pain have you had in the past 12 months?                                      | <input type="checkbox"/> 0 <input type="checkbox"/> 1 <input type="checkbox"/> 2 - 4 <input type="checkbox"/> 5 - 10 <input type="checkbox"/> 11 or more                                                                |                                         |
| D. On average, how long does each episode of low back pain last?                                               | <input type="checkbox"/> Less than 30 minutes<br><input type="checkbox"/> 30 minutes to less than 2 hours<br><input type="checkbox"/> 2 hours to 7 days<br><input type="checkbox"/> More than 7 days of continuous pain |                                         |
| E. Has your low back pain ever been accompanied by pain going down into your buttocks, upper leg or lower leg? | <input type="checkbox"/> Yes                                                                                                                                                                                            | <input type="checkbox"/> No             |

If answered "No" to question 51E skip to question 51G.

F. In which area(s) did the low back pain travel to? Mark (☒) all that apply.

Buttocks     Upper leg(s)     Lower leg(s)

|                                                 | Yes                      | No                       |
|-------------------------------------------------|--------------------------|--------------------------|
| G. Have you ever had surgery for low back pain? | <input type="checkbox"/> | <input type="checkbox"/> |

Mark (☒) one response for each item and do not skip any items unless instructed to do so. If you change your mind, fill the incorrect mark completely and then mark (☒) the new response.

52. In the past 3 months, did you have discomfort or pain in your abdomen that was present during at least 3 weeks (lasting at least one day each week)? (For women, do not consider abdominal discomfort or pain related to your menstrual cycle or period.)

|                          |                          |
|--------------------------|--------------------------|
| <b>Yes</b>               | <b>No, or rarely</b>     |
| <input type="checkbox"/> | <input type="checkbox"/> |

If answered "No" to question 52 skip to question 53.

|                                                                                                                             | <b>Yes</b>               | <b>No</b>                |
|-----------------------------------------------------------------------------------------------------------------------------|--------------------------|--------------------------|
| A. Does your discomfort or pain get better or stop after you have a bowel movement?                                         | <input type="checkbox"/> | <input type="checkbox"/> |
| B. When the discomfort or pain starts, do you have a change in your usual number of bowel movements (either more or fewer)? | <input type="checkbox"/> | <input type="checkbox"/> |
| C. When the discomfort or pain starts, do you have either softer or harder stools than usual?                               | <input type="checkbox"/> | <input type="checkbox"/> |

53. Would you say that you have had any of the following at least one quarter of the time over the past three months?

|                                                           | <b>Yes</b>               | <b>No</b>                |
|-----------------------------------------------------------|--------------------------|--------------------------|
| A. Fewer than three bowel movements a week (0-2)          | <input type="checkbox"/> | <input type="checkbox"/> |
| B. More than three bowel movements a day (4 or more)      | <input type="checkbox"/> | <input type="checkbox"/> |
| C. Hard or lumpy stools                                   | <input type="checkbox"/> | <input type="checkbox"/> |
| D. Loose, mushy or watery stools                          | <input type="checkbox"/> | <input type="checkbox"/> |
| E. Straining during a bowel movement                      | <input type="checkbox"/> | <input type="checkbox"/> |
| F. Having to rush to the toilet to have a bowel movement  | <input type="checkbox"/> | <input type="checkbox"/> |
| G. Feeling of incomplete emptying after a bowel movement  | <input type="checkbox"/> | <input type="checkbox"/> |
| H. Passing mucus (slime) during a bowel movement          | <input type="checkbox"/> | <input type="checkbox"/> |
| I. Abdominal fullness, bloating or swelling               | <input type="checkbox"/> | <input type="checkbox"/> |
| J. Alternation between hard/lumpy and loose/watery stools | <input type="checkbox"/> | <input type="checkbox"/> |

|                                                                                                                                                                                                       | <b>Yes</b>               | <b>No</b>                |
|-------------------------------------------------------------------------------------------------------------------------------------------------------------------------------------------------------|--------------------------|--------------------------|
| 54. Have you ever experienced itching in your genital area that persisted for 3 months or longer?                                                                                                     | <input type="checkbox"/> | <input type="checkbox"/> |
| 55. Have you ever experienced burning in your genital area that persisted for 3 months or longer?                                                                                                     | <input type="checkbox"/> | <input type="checkbox"/> |
| 56. Have you ever experienced periodic knife-like or sharp pain in your genital area that persisted for 3 months or longer?                                                                           | <input type="checkbox"/> | <input type="checkbox"/> |
| 57. Have you ever experienced excessive pain on contact to your genital area? For example, upon insertion of a tampon (if female), at the time of sexual intercourse, or during a pelvic examination. | <input type="checkbox"/> | <input type="checkbox"/> |

Date filled out (mm-dd-yyyy)

|  |  |   |  |  |   |  |  |  |  |
|--|--|---|--|--|---|--|--|--|--|
|  |  | - |  |  | - |  |  |  |  |
|--|--|---|--|--|---|--|--|--|--|

JFLS OPPERA

RESPONDENT ID LABEL

For each of the items listed below, indicate the level of limitation **during the last month**. If the activity has been completely avoided because it is too difficult, then mark (☒) the "10" column. If you avoid an activity for reasons other than pain or difficulty, then mark (☒) the "NA" (Not Applicable) column.

Mark (☒) one response for each item and do not skip any items. If you change your mind, fill the incorrect mark completely and then mark (☒) the new response.

|                                                                                                   | NA                       | No Limitation            |                          |                          |                          |                          |                          |                          |                          |                          |                          | Severe Limitation        |                          |
|---------------------------------------------------------------------------------------------------|--------------------------|--------------------------|--------------------------|--------------------------|--------------------------|--------------------------|--------------------------|--------------------------|--------------------------|--------------------------|--------------------------|--------------------------|--------------------------|
|                                                                                                   |                          | 0                        | 1                        | 2                        | 3                        | 4                        | 5                        | 6                        | 7                        | 8                        | 9                        | 10                       |                          |
| 1. Chew tough food.                                                                               | <input type="checkbox"/> |
| 2. Chew hard bread.                                                                               | <input type="checkbox"/> |
| 3. Chew chicken (e.g., prepared in oven).                                                         | <input type="checkbox"/> |
| 4. Chew crackers.                                                                                 | <input type="checkbox"/> |
| 5. Chew soft food (e.g. macaroni, canned or soft fruits, cooked vegetables, fish).                | <input type="checkbox"/> |
| 6. Eat soft food requiring no chewing (e.g., mashed potatoes, apple sauce, pudding, pureed food). | <input type="checkbox"/> |
| 7. Open wide enough to bite from a whole apple.                                                   | <input type="checkbox"/> |
| 8. Open wide enough to bite into a sandwich.                                                      | <input type="checkbox"/> |
| 9. Open wide enough to talk.                                                                      | <input type="checkbox"/> |
| 10. Open wide enough to drink from a cup.                                                         | <input type="checkbox"/> |
| 11. Swallow.                                                                                      | <input type="checkbox"/> |
| 12. Yawn.                                                                                         | <input type="checkbox"/> |
| 13. Talk.                                                                                         | <input type="checkbox"/> |
| 14. Sing.                                                                                         | <input type="checkbox"/> |
| 15. Putting on a happy face.                                                                      | <input type="checkbox"/> |
| 16. Putting on an angry face.                                                                     | <input type="checkbox"/> |
| 17. Frown.                                                                                        | <input type="checkbox"/> |
| 18. Kiss.                                                                                         | <input type="checkbox"/> |
| 19. Smile.                                                                                        | <input type="checkbox"/> |
| 20. Putting on a sad face.                                                                        | <input type="checkbox"/> |
| 21. Laugh.                                                                                        | <input type="checkbox"/> |

Date filled out (mm-dd-yyyy)

**MEDICAL HISTORY OPPERA**

RESPONDENT ID LABEL

Mark (☒) one response for each item and do not skip any items. If you change your mind, fill the incorrect mark completely and then mark (☒) the new response.

Please answer each condition by marking (☒) the "Yes" box for any condition that you have had in the **past** or have **now**, or "No" if you have never had that condition.

|                                                 | Yes                      | No                       |
|-------------------------------------------------|--------------------------|--------------------------|
| <b>1. Cardiovascular Conditions:</b>            |                          |                          |
| Mitral valve prolapse                           | <input type="checkbox"/> | <input type="checkbox"/> |
| High blood pressure                             | <input type="checkbox"/> | <input type="checkbox"/> |
| Angina                                          | <input type="checkbox"/> | <input type="checkbox"/> |
| Heart attack                                    | <input type="checkbox"/> | <input type="checkbox"/> |
| Heart failure                                   | <input type="checkbox"/> | <input type="checkbox"/> |
| Pacemaker/Defibrillator                         | <input type="checkbox"/> | <input type="checkbox"/> |
| Stroke                                          | <input type="checkbox"/> | <input type="checkbox"/> |
| Other heart problems                            | <input type="checkbox"/> | <input type="checkbox"/> |
| <b>2. Hematologic:</b>                          |                          |                          |
| Anemia                                          | <input type="checkbox"/> | <input type="checkbox"/> |
| Hemophilia/other bleeding disorders             | <input type="checkbox"/> | <input type="checkbox"/> |
| Leukemia                                        | <input type="checkbox"/> | <input type="checkbox"/> |
| <b>3. Neural &amp; Sensory:</b>                 |                          |                          |
| Earaches, ringing in ears                       | <input type="checkbox"/> | <input type="checkbox"/> |
| Hearing loss                                    | <input type="checkbox"/> | <input type="checkbox"/> |
| Severe headaches                                | <input type="checkbox"/> | <input type="checkbox"/> |
| Fainting or dizzy spells                        | <input type="checkbox"/> | <input type="checkbox"/> |
| Epilepsy, seizures or convulsions               | <input type="checkbox"/> | <input type="checkbox"/> |
| Psychiatric treatment                           | <input type="checkbox"/> | <input type="checkbox"/> |
| <b>4. Gastrointestinal:</b>                     |                          |                          |
| Stomach/intestinal ulcers                       | <input type="checkbox"/> | <input type="checkbox"/> |
| Gastritis                                       | <input type="checkbox"/> | <input type="checkbox"/> |
| Colitis                                         | <input type="checkbox"/> | <input type="checkbox"/> |
| Persistent diarrhea                             | <input type="checkbox"/> | <input type="checkbox"/> |
| Hepatitis                                       | <input type="checkbox"/> | <input type="checkbox"/> |
| <b>5. Endocrine:</b>                            |                          |                          |
| Diabetes                                        | <input type="checkbox"/> | <input type="checkbox"/> |
| Hypothyroid disease                             | <input type="checkbox"/> | <input type="checkbox"/> |
| Hyperthyroid disease                            | <input type="checkbox"/> | <input type="checkbox"/> |
| <b>6. Respiratory:</b>                          |                          |                          |
| Sinus trouble                                   | <input type="checkbox"/> | <input type="checkbox"/> |
| Allergies or hives                              | <input type="checkbox"/> | <input type="checkbox"/> |
| Asthma                                          | <input type="checkbox"/> | <input type="checkbox"/> |
| Tuberculosis (TB)                               | <input type="checkbox"/> | <input type="checkbox"/> |
| Breathing difficulties                          | <input type="checkbox"/> | <input type="checkbox"/> |
| Sleep apnea                                     | <input type="checkbox"/> | <input type="checkbox"/> |
| <b>7. Dermal Mucocutaneous Musculoskeletal:</b> |                          |                          |
| Allergy to latex (rubber)                       | <input type="checkbox"/> | <input type="checkbox"/> |
| Skin rashes                                     | <input type="checkbox"/> | <input type="checkbox"/> |
| Night sweats                                    | <input type="checkbox"/> | <input type="checkbox"/> |
| Muscle problems                                 | <input type="checkbox"/> | <input type="checkbox"/> |
| Fibromyalgia/Chronic Fatigue Syndrome           | <input type="checkbox"/> | <input type="checkbox"/> |
| Osteoarthritis                                  | <input type="checkbox"/> | <input type="checkbox"/> |
| Rheumatoid Arthritis                            | <input type="checkbox"/> | <input type="checkbox"/> |
| Sjogren's Syndrome                              | <input type="checkbox"/> | <input type="checkbox"/> |

RESPONDENT ID LABEL

Mark (☒) one response for each item and do not skip any items. If you change your mind, fill the incorrect mark completely and then mark (☒) the new response.

Please answer each condition by marking (☒) the "Yes" box for any condition that you have had in the **past** or have **now**, or "No" if you have never had that condition.

| 8. Urinary-Sexually Transmitted:                                                 | Yes                      | No                       |
|----------------------------------------------------------------------------------|--------------------------|--------------------------|
| Sexually transmitted disease (syphilis, gonorrhea, chlamydia, or genital herpes) | <input type="checkbox"/> | <input type="checkbox"/> |
| HIV positive                                                                     | <input type="checkbox"/> | <input type="checkbox"/> |
| AIDS                                                                             | <input type="checkbox"/> | <input type="checkbox"/> |

  

| 9. Other Conditions:                        | Yes                      | No                       |
|---------------------------------------------|--------------------------|--------------------------|
| Use alcohol                                 | <input type="checkbox"/> | <input type="checkbox"/> |
| Drug/alcohol addiction (current/recovering) | <input type="checkbox"/> | <input type="checkbox"/> |
| Tumor or cancer                             | <input type="checkbox"/> | <input type="checkbox"/> |
| Chemotherapy                                | <input type="checkbox"/> | <input type="checkbox"/> |
| Radiation therapy                           | <input type="checkbox"/> | <input type="checkbox"/> |

  

| 10. Obstructive Sleep / Breathing Problems: | Yes                      | No                       |
|---------------------------------------------|--------------------------|--------------------------|
|                                             | <input type="checkbox"/> | <input type="checkbox"/> |

  

| 11. Disease, problem or condition not listed | Yes                      | No                       |
|----------------------------------------------|--------------------------|--------------------------|
| _____                                        | <input type="checkbox"/> | <input type="checkbox"/> |
| _____                                        | <input type="checkbox"/> | <input type="checkbox"/> |
| _____                                        | <input type="checkbox"/> | <input type="checkbox"/> |
| _____                                        | <input type="checkbox"/> | <input type="checkbox"/> |

  

| 12. Medications: taken in the past                | Yes                      | No                       |
|---------------------------------------------------|--------------------------|--------------------------|
| Antihistamines                                    | <input type="checkbox"/> | <input type="checkbox"/> |
| Aspirin/other pain medications                    | <input type="checkbox"/> | <input type="checkbox"/> |
| Corticosteroids                                   | <input type="checkbox"/> | <input type="checkbox"/> |
| Dilantin                                          | <input type="checkbox"/> | <input type="checkbox"/> |
| Insulin, tolbutamide/drugs to control blood sugar | <input type="checkbox"/> | <input type="checkbox"/> |
| Anticoagulants (blood thinners)                   | <input type="checkbox"/> | <input type="checkbox"/> |
| Anti-hypertensives (blood pressure medications)   | <input type="checkbox"/> | <input type="checkbox"/> |
| Digitalis or drugs for heart trouble              | <input type="checkbox"/> | <input type="checkbox"/> |
| Nitroglycerine                                    | <input type="checkbox"/> | <input type="checkbox"/> |
| Tranquilizers                                     | <input type="checkbox"/> | <input type="checkbox"/> |
| Antidepressants                                   | <input type="checkbox"/> | <input type="checkbox"/> |

  

| 13. Medications being taken now (Include herbal and over the counter medications): Please list one per line. |
|--------------------------------------------------------------------------------------------------------------|
| _____                                                                                                        |
| _____                                                                                                        |
| _____                                                                                                        |
| _____                                                                                                        |
| _____                                                                                                        |
| _____                                                                                                        |
| _____                                                                                                        |
| _____                                                                                                        |

Mark (☒) one response for each item and do not skip any items unless otherwise specified. If you change your mind, fill the incorrect mark completely and then mark (☒) the new response.

14. Have you smoked at least 100 cigarettes in your entire life?  Yes  
 No → IF "NO" SKIP TO 18  
 Don't Know / Not Sure

15. Previously you said you have smoked cigarettes. How old were you the first time you smoked a cigarette, even one or two puffs?  Enter age in years

16. Do you now smoke cigarettes everyday, some days, or not at all?  Everyday  Some days  Not at all

17. How old were you when you first started smoking cigarettes regularly?  Enter age in years  
If never smoked regularly, enter 88.

18. How do you describe your health overall?  Excellent  Good  Fair  Poor

19. Have you been hospitalized for any surgical operation or serious illness? Yes  No   
If yes, please describe.

FOR OFFICE USE ONLY

20. Examiner Comments:

Date filled out (mm-dd-yyyy)

OBC OPPERA

RESPONDENT ID LABEL

How often do you do each of the following activities, based on **the last month**? If the frequency of the activity varies, choose the higher option.

Mark (☒) one response for each item and do not skip any items. If you change your mind, fill the incorrect mark completely and then mark (☒) the new response.

| Activities During Sleep                                                                                            | None of the time         | < 1 Night / Month        | 1-3 Nights / Month       | 1-3 Nights / Week        | 4-7 Nights / Week        |
|--------------------------------------------------------------------------------------------------------------------|--------------------------|--------------------------|--------------------------|--------------------------|--------------------------|
| 1. Clench or grind teeth <b>when asleep</b> , based on any information you may have.                               | <input type="checkbox"/> |
| 2. Sleep in a position that puts pressure on the jaw (for example, on stomach, on the side).                       | <input type="checkbox"/> |
| Activities During Waking Hours                                                                                     | None of the time         | A little of the time     | Some of the time         | Most of the time         | All of the time          |
| 3. Grind teeth together <b>during waking hours</b> .                                                               | <input type="checkbox"/> |
| 4. Clench teeth together <b>during waking hours</b> .                                                              | <input type="checkbox"/> |
| 5. Press, touch, or hold teeth together other than while eating (that is, contact between upper and lower teeth).  | <input type="checkbox"/> |
| 6. Hold, tighten, or tense muscles without clenching or bringing teeth together.                                   | <input type="checkbox"/> |
| 7. Hold or jut jaw forward or to the side.                                                                         | <input type="checkbox"/> |
| 8. Press tongue forcibly against teeth.                                                                            | <input type="checkbox"/> |
| 9. Place tongue between teeth.                                                                                     | <input type="checkbox"/> |
| 10. Bite, chew, or play with your tongue, cheeks or lips.                                                          | <input type="checkbox"/> |
| 11. Hold jaw in rigid or tense position, such as to brace or protect the jaw.                                      | <input type="checkbox"/> |
| 12. Hold between the teeth or bite objects such as hair, pipe, pencil, pens, fingers, fingernails, etc.            | <input type="checkbox"/> |
| 13. Use chewing gum.                                                                                               | <input type="checkbox"/> |
| 14. Play musical instrument that involves use of mouth or jaw (for example, woodwinds, brass, string instruments). | <input type="checkbox"/> |
| 15. Lean with your hand on the jaw, such as cupping or resting the chin in the hand.                               | <input type="checkbox"/> |
| 16. Chew food on one side only.                                                                                    | <input type="checkbox"/> |
| 17. Eating between meals (that is, food that requires chewing).                                                    | <input type="checkbox"/> |
| 18. Sustained talking (for example, teaching, sales, customer service).                                            | <input type="checkbox"/> |
| 19. Singing.                                                                                                       | <input type="checkbox"/> |
| 20. Yawning.                                                                                                       | <input type="checkbox"/> |
| 21. Hold telephone between your head and shoulders.                                                                | <input type="checkbox"/> |



Date filled out (mm-dd-yyyy)

# RDC TMJD EXAM OPPEA

RESPONDENT ID LABEL

Examiner ID:

## 1. Scope of this Examination

- Administer SCREENING PAIN SELF REPORT.
- Subject reads pain definition card.
- Review scope of examination.

### FOR OFFICE USE ONLY

Screening Classification

- 1 Potential Study 1     4 Negative QHU  
 2 Potential Study 2     5 Recall  
 3 Positive QHU

## 2. Laterality of Pain: Last month (Choose one)

- None     Right     Left     Both

## 3. Location of Pain: Last month (Select all that apply)

### RIGHT PAIN

- None     Temporalis     Other m. muscles     TMJ     Neck

### LEFT PAIN

- None     Temporalis     Other m. muscles     TMJ     Neck

## 4. Incisal Relationships

A. Maxillary Incisor Used (Choose one)     8     9

B. Horizontal Incisor Overjet     If negative     mm

C. Vertical Incisor Overbite     If negative     mm

## 5. Opening-Closing Pattern (Choose one)

- Straight     Deviation     Right lateral deflection     Left lateral deflection

## 6. Vertical Range of Mandibular Motion

### A. Pain Free Opening

mm

### B. Maximum Unassisted Opening

mm

### C. Maximum Assisted Opening

mm

D. Terminated?     N     Y

|            | RIGHT SIDE                                                 |                                                            |                                                                     | LEFT SIDE                                                  |                                                            |                                                                     |
|------------|------------------------------------------------------------|------------------------------------------------------------|---------------------------------------------------------------------|------------------------------------------------------------|------------------------------------------------------------|---------------------------------------------------------------------|
|            | Pain                                                       | Familiar Pain                                              | Familiar Headache                                                   | Pain                                                       | Familiar Pain                                              | Familiar Headache                                                   |
| Temporalis | <input type="radio"/> N <input type="radio"/> Y            | <input type="radio"/> N <input type="radio"/> Y            | <input type="radio"/> N <input type="radio"/> Y                     | <input type="radio"/> N <input type="radio"/> Y            | <input type="radio"/> N <input type="radio"/> Y            | <input type="radio"/> N <input type="radio"/> Y                     |
| L, M, or S | <input type="radio"/> N <input checked="" type="radio"/> Y | <input type="radio"/> N <input checked="" type="radio"/> Y | <input type="radio"/> N <input checked="" type="radio"/> Y          | <input type="radio"/> N <input checked="" type="radio"/> Y | <input type="radio"/> N <input checked="" type="radio"/> Y | <input type="radio"/> N <input checked="" type="radio"/> Y          |
| TMJ        | <input type="radio"/> N <input type="radio"/> Y            | <input type="radio"/> N <input type="radio"/> Y            | <input type="radio"/> N <input type="radio"/> Y                     | <input type="radio"/> N <input type="radio"/> Y            | <input type="radio"/> N <input type="radio"/> Y            | <input type="radio"/> N <input type="radio"/> Y                     |
| Neck       | <input type="radio"/> N <input type="radio"/> Y            | <input type="radio"/> N <input type="radio"/> Y            | <input type="radio"/> N <input type="radio"/> Y                     | <input type="radio"/> N <input type="radio"/> Y            | <input type="radio"/> N <input type="radio"/> Y            | <input type="radio"/> N <input type="radio"/> Y                     |
|            |                                                            |                                                            | Lat Pter <input type="radio"/> N <input checked="" type="radio"/> Y |                                                            |                                                            | Lat Pter <input type="radio"/> N <input checked="" type="radio"/> Y |
|            |                                                            |                                                            | Mass <input type="radio"/> N <input checked="" type="radio"/> Y     |                                                            |                                                            | Mass <input type="radio"/> N <input checked="" type="radio"/> Y     |
|            |                                                            |                                                            | Sub Mand <input type="radio"/> N <input checked="" type="radio"/> Y |                                                            |                                                            | Sub Mand <input type="radio"/> N <input checked="" type="radio"/> Y |

## 7. Mandibular Excursive Movements

### A. Right Lateral Excursion

Cannot assess

mm

### B. Left Lateral Excursion

Cannot assess

mm

### C. Protrusion

Cannot assess

mm

If negative

|            | RIGHT SIDE                                                 |                                                            |                                                                     | LEFT SIDE                                                  |                                                            |                                                                     |
|------------|------------------------------------------------------------|------------------------------------------------------------|---------------------------------------------------------------------|------------------------------------------------------------|------------------------------------------------------------|---------------------------------------------------------------------|
|            | Pain                                                       | Familiar Pain                                              | Familiar Headache                                                   | Pain                                                       | Familiar Pain                                              | Familiar Headache                                                   |
| Temporalis | <input type="radio"/> N <input type="radio"/> Y            | <input type="radio"/> N <input type="radio"/> Y            | <input type="radio"/> N <input type="radio"/> Y                     | <input type="radio"/> N <input type="radio"/> Y            | <input type="radio"/> N <input type="radio"/> Y            | <input type="radio"/> N <input type="radio"/> Y                     |
| L, M, or S | <input type="radio"/> N <input checked="" type="radio"/> Y | <input type="radio"/> N <input checked="" type="radio"/> Y | <input type="radio"/> N <input checked="" type="radio"/> Y          | <input type="radio"/> N <input checked="" type="radio"/> Y | <input type="radio"/> N <input checked="" type="radio"/> Y | <input type="radio"/> N <input checked="" type="radio"/> Y          |
| TMJ        | <input type="radio"/> N <input type="radio"/> Y            | <input type="radio"/> N <input type="radio"/> Y            | <input type="radio"/> N <input type="radio"/> Y                     | <input type="radio"/> N <input type="radio"/> Y            | <input type="radio"/> N <input type="radio"/> Y            | <input type="radio"/> N <input type="radio"/> Y                     |
| Neck       | <input type="radio"/> N <input type="radio"/> Y            | <input type="radio"/> N <input type="radio"/> Y            | <input type="radio"/> N <input type="radio"/> Y                     | <input type="radio"/> N <input type="radio"/> Y            | <input type="radio"/> N <input type="radio"/> Y            | <input type="radio"/> N <input type="radio"/> Y                     |
|            |                                                            |                                                            | Lat Pter <input type="radio"/> N <input checked="" type="radio"/> Y |                                                            |                                                            | Lat Pter <input type="radio"/> N <input checked="" type="radio"/> Y |
|            |                                                            |                                                            | Mass <input type="radio"/> N <input checked="" type="radio"/> Y     |                                                            |                                                            | Mass <input type="radio"/> N <input checked="" type="radio"/> Y     |
|            |                                                            |                                                            | Sub Mand <input type="radio"/> N <input checked="" type="radio"/> Y |                                                            |                                                            | Sub Mand <input type="radio"/> N <input checked="" type="radio"/> Y |

8. TMJ Sounds on Open and Close (palpation)

| RIGHT TMJ   |                         |                         |                         |                         |
|-------------|-------------------------|-------------------------|-------------------------|-------------------------|
|             | Open                    |                         | Close                   |                         |
| A. Click    | <input type="radio"/> N | <input type="radio"/> Y | <input type="radio"/> N | <input type="radio"/> Y |
| B. Crepitus | <input type="radio"/> N | <input type="radio"/> Y | <input type="radio"/> N | <input type="radio"/> Y |

| LEFT TMJ    |                         |                         |                         |                         |
|-------------|-------------------------|-------------------------|-------------------------|-------------------------|
|             | Open                    |                         | Close                   |                         |
| A. Click    | <input type="radio"/> N | <input type="radio"/> Y | <input type="radio"/> N | <input type="radio"/> Y |
| B. Crepitus | <input type="radio"/> N | <input type="radio"/> Y | <input type="radio"/> N | <input type="radio"/> Y |

9. TMJ Sounds on Open, Close and Horizontal Movements (auscultation)

| RIGHT JOINT OPEN AND CLOSE                                  |                                                    |                                                    |                                                    |  |
|-------------------------------------------------------------|----------------------------------------------------|----------------------------------------------------|----------------------------------------------------|--|
| Examiner                                                    | Subject                                            | Pain w/ sound                                      | Familiar Pain                                      |  |
| A. Click <input type="radio"/> N <input type="radio"/> Y    | D. <input type="radio"/> N <input type="radio"/> Y | G. <input type="radio"/> N <input type="radio"/> Y | H. <input type="radio"/> N <input type="radio"/> Y |  |
| B. Crepitus <input type="radio"/> N <input type="radio"/> Y | E. <input type="radio"/> N <input type="radio"/> Y |                                                    |                                                    |  |
| C. Other                                                    | F. <input type="radio"/> N <input type="radio"/> Y |                                                    |                                                    |  |

| LEFT JOINT OPEN AND CLOSE                                   |                                                    |                                                    |                                                    |  |
|-------------------------------------------------------------|----------------------------------------------------|----------------------------------------------------|----------------------------------------------------|--|
| Examiner                                                    | Subject                                            | Pain w/ sound                                      | Familiar Pain                                      |  |
| A. Click <input type="radio"/> N <input type="radio"/> Y    | D. <input type="radio"/> N <input type="radio"/> Y | G. <input type="radio"/> N <input type="radio"/> Y | H. <input type="radio"/> N <input type="radio"/> Y |  |
| B. Crepitus <input type="radio"/> N <input type="radio"/> Y | E. <input type="radio"/> N <input type="radio"/> Y |                                                    |                                                    |  |
| C. Other                                                    | F. <input type="radio"/> N <input type="radio"/> Y |                                                    |                                                    |  |

| RIGHT JOINT PROTRUSION AND CONTRALATERAL EXCURSION          |                                                    |                                                    |                                                    |  |
|-------------------------------------------------------------|----------------------------------------------------|----------------------------------------------------|----------------------------------------------------|--|
| Examiner                                                    | Subject                                            | Pain w/ sound                                      | Familiar Pain                                      |  |
| A. Click <input type="radio"/> N <input type="radio"/> Y    | D. <input type="radio"/> N <input type="radio"/> Y | G. <input type="radio"/> N <input type="radio"/> Y | H. <input type="radio"/> N <input type="radio"/> Y |  |
| B. Crepitus <input type="radio"/> N <input type="radio"/> Y | E. <input type="radio"/> N <input type="radio"/> Y |                                                    |                                                    |  |
| C. Other                                                    | F. <input type="radio"/> N <input type="radio"/> Y |                                                    |                                                    |  |

| LEFT JOINT PROTRUSION AND CONTRALATERAL EXCURSION           |                                                    |                                                    |                                                    |  |
|-------------------------------------------------------------|----------------------------------------------------|----------------------------------------------------|----------------------------------------------------|--|
| Examiner                                                    | Subject                                            | Pain w/ sound                                      | Familiar Pain                                      |  |
| A. Click <input type="radio"/> N <input type="radio"/> Y    | D. <input type="radio"/> N <input type="radio"/> Y | G. <input type="radio"/> N <input type="radio"/> Y | H. <input type="radio"/> N <input type="radio"/> Y |  |
| B. Crepitus <input type="radio"/> N <input type="radio"/> Y | E. <input type="radio"/> N <input type="radio"/> Y |                                                    |                                                    |  |
| C. Other                                                    | F. <input type="radio"/> N <input type="radio"/> Y |                                                    |                                                    |  |

10. Palpation for Pain (2 lbs): Extraoral Masticatory Muscles

| RIGHT                     |                                                 |                                                 |                                                 |                         |
|---------------------------|-------------------------------------------------|-------------------------------------------------|-------------------------------------------------|-------------------------|
|                           | Pain                                            | Familiar Pain                                   | Familiar Headache                               | RF                      |
| A. Temporalis (Posterior) |                                                 |                                                 |                                                 |                         |
| Inferior                  | <input type="radio"/> N <input type="radio"/> Y | <input type="radio"/> N <input type="radio"/> Y | <input type="radio"/> N <input type="radio"/> Y | <input type="radio"/> R |
| Middle                    | <input type="radio"/> N <input type="radio"/> Y | <input type="radio"/> N <input type="radio"/> Y | <input type="radio"/> N <input type="radio"/> Y | <input type="radio"/> R |
| Superior                  | <input type="radio"/> N <input type="radio"/> Y | <input type="radio"/> N <input type="radio"/> Y | <input type="radio"/> N <input type="radio"/> Y | <input type="radio"/> R |
| B. Temporalis (Middle)    |                                                 |                                                 |                                                 |                         |
| Inferior                  | <input type="radio"/> N <input type="radio"/> Y | <input type="radio"/> N <input type="radio"/> Y | <input type="radio"/> N <input type="radio"/> Y | <input type="radio"/> R |
| Middle                    | <input type="radio"/> N <input type="radio"/> Y | <input type="radio"/> N <input type="radio"/> Y | <input type="radio"/> N <input type="radio"/> Y | <input type="radio"/> R |
| Superior                  | <input type="radio"/> N <input type="radio"/> Y | <input type="radio"/> N <input type="radio"/> Y | <input type="radio"/> N <input type="radio"/> Y | <input type="radio"/> R |
| C. Temporalis (Anterior)  |                                                 |                                                 |                                                 |                         |
| Inferior                  | <input type="radio"/> N <input type="radio"/> Y | <input type="radio"/> N <input type="radio"/> Y | <input type="radio"/> N <input type="radio"/> Y | <input type="radio"/> R |
| Middle                    | <input type="radio"/> N <input type="radio"/> Y | <input type="radio"/> N <input type="radio"/> Y | <input type="radio"/> N <input type="radio"/> Y | <input type="radio"/> R |
| Superior                  | <input type="radio"/> N <input type="radio"/> Y | <input type="radio"/> N <input type="radio"/> Y | <input type="radio"/> N <input type="radio"/> Y | <input type="radio"/> R |

| LEFT                      |                                                 |                                                 |                                                 |                         |
|---------------------------|-------------------------------------------------|-------------------------------------------------|-------------------------------------------------|-------------------------|
|                           | Pain                                            | Familiar Pain                                   | Familiar Headache                               | RF                      |
| A. Temporalis (Posterior) |                                                 |                                                 |                                                 |                         |
| Inferior                  | <input type="radio"/> N <input type="radio"/> Y | <input type="radio"/> N <input type="radio"/> Y | <input type="radio"/> N <input type="radio"/> Y | <input type="radio"/> R |
| Middle                    | <input type="radio"/> N <input type="radio"/> Y | <input type="radio"/> N <input type="radio"/> Y | <input type="radio"/> N <input type="radio"/> Y | <input type="radio"/> R |
| Superior                  | <input type="radio"/> N <input type="radio"/> Y | <input type="radio"/> N <input type="radio"/> Y | <input type="radio"/> N <input type="radio"/> Y | <input type="radio"/> R |
| B. Temporalis (Middle)    |                                                 |                                                 |                                                 |                         |
| Inferior                  | <input type="radio"/> N <input type="radio"/> Y | <input type="radio"/> N <input type="radio"/> Y | <input type="radio"/> N <input type="radio"/> Y | <input type="radio"/> R |
| Middle                    | <input type="radio"/> N <input type="radio"/> Y | <input type="radio"/> N <input type="radio"/> Y | <input type="radio"/> N <input type="radio"/> Y | <input type="radio"/> R |
| Superior                  | <input type="radio"/> N <input type="radio"/> Y | <input type="radio"/> N <input type="radio"/> Y | <input type="radio"/> N <input type="radio"/> Y | <input type="radio"/> R |
| C. Temporalis (Anterior)  |                                                 |                                                 |                                                 |                         |
| Inferior                  | <input type="radio"/> N <input type="radio"/> Y | <input type="radio"/> N <input type="radio"/> Y | <input type="radio"/> N <input type="radio"/> Y | <input type="radio"/> R |
| Middle                    | <input type="radio"/> N <input type="radio"/> Y | <input type="radio"/> N <input type="radio"/> Y | <input type="radio"/> N <input type="radio"/> Y | <input type="radio"/> R |
| Superior                  | <input type="radio"/> N <input type="radio"/> Y | <input type="radio"/> N <input type="radio"/> Y | <input type="radio"/> N <input type="radio"/> Y | <input type="radio"/> R |

| RIGHT                   |                                                 |                                                 |                         |
|-------------------------|-------------------------------------------------|-------------------------------------------------|-------------------------|
|                         | Pain                                            | Familiar Pain                                   | RF                      |
| D. Masseter (Origin)    |                                                 |                                                 |                         |
| Posterior               | <input type="radio"/> N <input type="radio"/> Y | <input type="radio"/> N <input type="radio"/> Y | <input type="radio"/> R |
| Middle                  | <input type="radio"/> N <input type="radio"/> Y | <input type="radio"/> N <input type="radio"/> Y | <input type="radio"/> R |
| Anterior                | <input type="radio"/> N <input type="radio"/> Y | <input type="radio"/> N <input type="radio"/> Y | <input type="radio"/> R |
| E. Masseter (Body)      |                                                 |                                                 |                         |
| Posterior               | <input type="radio"/> N <input type="radio"/> Y | <input type="radio"/> N <input type="radio"/> Y | <input type="radio"/> R |
| Middle                  | <input type="radio"/> N <input type="radio"/> Y | <input type="radio"/> N <input type="radio"/> Y | <input type="radio"/> R |
| Anterior                | <input type="radio"/> N <input type="radio"/> Y | <input type="radio"/> N <input type="radio"/> Y | <input type="radio"/> R |
| F. Masseter (Insertion) |                                                 |                                                 |                         |
| Posterior               | <input type="radio"/> N <input type="radio"/> Y | <input type="radio"/> N <input type="radio"/> Y | <input type="radio"/> R |
| Middle                  | <input type="radio"/> N <input type="radio"/> Y | <input type="radio"/> N <input type="radio"/> Y | <input type="radio"/> R |
| Anterior                | <input type="radio"/> N <input type="radio"/> Y | <input type="radio"/> N <input type="radio"/> Y | <input type="radio"/> R |

| LEFT                    |                                                 |                                                 |                         |
|-------------------------|-------------------------------------------------|-------------------------------------------------|-------------------------|
|                         | Pain                                            | Familiar Pain                                   | RF                      |
| D. Masseter (Origin)    |                                                 |                                                 |                         |
| Posterior               | <input type="radio"/> N <input type="radio"/> Y | <input type="radio"/> N <input type="radio"/> Y | <input type="radio"/> R |
| Middle                  | <input type="radio"/> N <input type="radio"/> Y | <input type="radio"/> N <input type="radio"/> Y | <input type="radio"/> R |
| Anterior                | <input type="radio"/> N <input type="radio"/> Y | <input type="radio"/> N <input type="radio"/> Y | <input type="radio"/> R |
| E. Masseter (Body)      |                                                 |                                                 |                         |
| Posterior               | <input type="radio"/> N <input type="radio"/> Y | <input type="radio"/> N <input type="radio"/> Y | <input type="radio"/> R |
| Middle                  | <input type="radio"/> N <input type="radio"/> Y | <input type="radio"/> N <input type="radio"/> Y | <input type="radio"/> R |
| Anterior                | <input type="radio"/> N <input type="radio"/> Y | <input type="radio"/> N <input type="radio"/> Y | <input type="radio"/> R |
| F. Masseter (Insertion) |                                                 |                                                 |                         |
| Posterior               | <input type="radio"/> N <input type="radio"/> Y | <input type="radio"/> N <input type="radio"/> Y | <input type="radio"/> R |
| Middle                  | <input type="radio"/> N <input type="radio"/> Y | <input type="radio"/> N <input type="radio"/> Y | <input type="radio"/> R |
| Anterior                | <input type="radio"/> N <input type="radio"/> Y | <input type="radio"/> N <input type="radio"/> Y | <input type="radio"/> R |

11. Palpation for Pain (2 lbs): Neck Muscles

| RIGHT                                       |                                                 |                                                 |                         | LEFT                                        |                                                 |                                                 |                         |
|---------------------------------------------|-------------------------------------------------|-------------------------------------------------|-------------------------|---------------------------------------------|-------------------------------------------------|-------------------------------------------------|-------------------------|
|                                             | Pain                                            | Familiar Pain                                   | RF                      |                                             | Pain                                            | Familiar Pain                                   | RF                      |
| A. SCM                                      | <input type="radio"/> N <input type="radio"/> Y | <input type="radio"/> N <input type="radio"/> Y | <input type="radio"/> R | A. SCM                                      | <input type="radio"/> N <input type="radio"/> Y | <input type="radio"/> N <input type="radio"/> Y | <input type="radio"/> R |
| Upper                                       | <input type="radio"/> N <input type="radio"/> Y | <input type="radio"/> N <input type="radio"/> Y | <input type="radio"/> R | a. Upper                                    | <input type="radio"/> N <input type="radio"/> Y | <input type="radio"/> N <input type="radio"/> Y | <input type="radio"/> R |
| Middle                                      | <input type="radio"/> N <input type="radio"/> Y | <input type="radio"/> N <input type="radio"/> Y | <input type="radio"/> R | b. Middle                                   | <input type="radio"/> N <input type="radio"/> Y | <input type="radio"/> N <input type="radio"/> Y | <input type="radio"/> R |
| Lower                                       | <input type="radio"/> N <input type="radio"/> Y | <input type="radio"/> N <input type="radio"/> Y | <input type="radio"/> R | c. Lower                                    | <input type="radio"/> N <input type="radio"/> Y | <input type="radio"/> N <input type="radio"/> Y | <input type="radio"/> R |
| B. Upper Splenius Capitus                   | <input type="radio"/> N <input type="radio"/> Y | <input type="radio"/> N <input type="radio"/> Y | <input type="radio"/> R | B. Upper Splenius Capitus                   | <input type="radio"/> N <input type="radio"/> Y | <input type="radio"/> N <input type="radio"/> Y | <input type="radio"/> R |
| C. Upper Semispinalis Capitus               | <input type="radio"/> N <input type="radio"/> Y | <input type="radio"/> N <input type="radio"/> Y | <input type="radio"/> R | C. Upper Semispinalis Capitus               | <input type="radio"/> N <input type="radio"/> Y | <input type="radio"/> N <input type="radio"/> Y | <input type="radio"/> R |
| D. Mid Splenius Capitus (C <sub>3</sub> )   | <input type="radio"/> N <input type="radio"/> Y | <input type="radio"/> N <input type="radio"/> Y | <input type="radio"/> R | D. Mid Splenius Capitus (C <sub>3</sub> )   | <input type="radio"/> N <input type="radio"/> Y | <input type="radio"/> N <input type="radio"/> Y | <input type="radio"/> R |
| E. Lower Splenius Capitus (C <sub>6</sub> ) | <input type="radio"/> N <input type="radio"/> Y | <input type="radio"/> N <input type="radio"/> Y | <input type="radio"/> R | E. Lower Splenius Capitus (C <sub>6</sub> ) | <input type="radio"/> N <input type="radio"/> Y | <input type="radio"/> N <input type="radio"/> Y | <input type="radio"/> R |

12. Palpation for Pain (1 lb): Extraoral Masticatory Muscles

| RIGHT                   |                                                 |                                                 |                         | LEFT                    |                                                 |                                                 |                         |
|-------------------------|-------------------------------------------------|-------------------------------------------------|-------------------------|-------------------------|-------------------------------------------------|-------------------------------------------------|-------------------------|
|                         | Pain                                            | Familiar Pain                                   | RF                      |                         | Pain                                            | Familiar Pain                                   | RF                      |
| A. Posterior Mandibular | <input type="radio"/> N <input type="radio"/> Y | <input type="radio"/> N <input type="radio"/> Y | <input type="radio"/> R | A. Posterior Mandibular | <input type="radio"/> N <input type="radio"/> Y | <input type="radio"/> N <input type="radio"/> Y | <input type="radio"/> R |
| B. Submandibular Region | <input type="radio"/> N <input type="radio"/> Y | <input type="radio"/> N <input type="radio"/> Y | <input type="radio"/> R | B. Submandibular Region | <input type="radio"/> N <input type="radio"/> Y | <input type="radio"/> N <input type="radio"/> Y | <input type="radio"/> R |

13. Palpation for Pain (1 lb): TMJ

| RIGHT                       |                                                 |                                                 |                         | LEFT                        |                                                 |                                                 |                         |
|-----------------------------|-------------------------------------------------|-------------------------------------------------|-------------------------|-----------------------------|-------------------------------------------------|-------------------------------------------------|-------------------------|
|                             | Pain                                            | Familiar Pain                                   | RF                      |                             | Pain                                            | Familiar Pain                                   | RF                      |
| A. Lateral Pole TMJ         | <input type="radio"/> N <input type="radio"/> Y | <input type="radio"/> N <input type="radio"/> Y | <input type="radio"/> R | A. Lateral Pole TMJ         | <input type="radio"/> N <input type="radio"/> Y | <input type="radio"/> N <input type="radio"/> Y | <input type="radio"/> R |
| B. Posterior Attachment TMJ | <input type="radio"/> N <input type="radio"/> Y | <input type="radio"/> N <input type="radio"/> Y | <input type="radio"/> R | B. Posterior Attachment TMJ | <input type="radio"/> N <input type="radio"/> Y | <input type="radio"/> N <input type="radio"/> Y | <input type="radio"/> R |
| C. Dorsal Aspect TMJ        | <input type="radio"/> N <input type="radio"/> Y | <input type="radio"/> N <input type="radio"/> Y | <input type="radio"/> R | C. Dorsal Aspect TMJ        | <input type="radio"/> N <input type="radio"/> Y | <input type="radio"/> N <input type="radio"/> Y | <input type="radio"/> R |

14. Palpation for Pain (1 lb): Intraoral Masticatory Muscles

| RIGHT                     |                                                 |                                                 |                         | LEFT                      |                                                 |                                                 |                         |
|---------------------------|-------------------------------------------------|-------------------------------------------------|-------------------------|---------------------------|-------------------------------------------------|-------------------------------------------------|-------------------------|
|                           | Pain                                            | Familiar Pain                                   | RF                      |                           | Pain                                            | Familiar Pain                                   | RF                      |
| A. Lateral Pterygoid Area | <input type="radio"/> N <input type="radio"/> Y | <input type="radio"/> N <input type="radio"/> Y | <input type="radio"/> R | A. Lateral Pterygoid Area | <input type="radio"/> N <input type="radio"/> Y | <input type="radio"/> N <input type="radio"/> Y | <input type="radio"/> R |
| B. Tendon of Temporalis   | <input type="radio"/> N <input type="radio"/> Y | <input type="radio"/> N <input type="radio"/> Y | <input type="radio"/> R | B. Tendon of Temporalis   | <input type="radio"/> N <input type="radio"/> Y | <input type="radio"/> N <input type="radio"/> Y | <input type="radio"/> R |
| C. Medial Masseter        | <input type="radio"/> N <input type="radio"/> Y | <input type="radio"/> N <input type="radio"/> Y | <input type="radio"/> R | C. Medial Masseter        | <input type="radio"/> N <input type="radio"/> Y | <input type="radio"/> N <input type="radio"/> Y | <input type="radio"/> R |

15. Intraoral Findings

| RIGHT                |                                                               |  |                                                              | LEFT                 |                                                 |  |  |
|----------------------|---------------------------------------------------------------|--|--------------------------------------------------------------|----------------------|-------------------------------------------------|--|--|
| A. Cheek Ridging     | <input type="radio"/> N <input type="radio"/> Y               |  |                                                              | A. Cheek Ridging     | <input type="radio"/> N <input type="radio"/> Y |  |  |
| B. Tongue Scalloping | <input type="radio"/> N <input type="radio"/> Y               |  |                                                              | B. Tongue Scalloping | <input type="radio"/> N <input type="radio"/> Y |  |  |
| C. Bruxofacets       | Right Lateral <input type="radio"/> N <input type="radio"/> Y |  | Left Lateral <input type="radio"/> N <input type="radio"/> Y | Protrusions          | <input type="radio"/> N <input type="radio"/> Y |  |  |

16. Palpation for Pain (3 lbs): General Body Examination

| RIGHT                 |                                                 |                                                 |                         | LEFT                  |                                                 |                                                 |                         |
|-----------------------|-------------------------------------------------|-------------------------------------------------|-------------------------|-----------------------|-------------------------------------------------|-------------------------------------------------|-------------------------|
|                       | Pain                                            | Familiar Pain                                   | RF                      |                       | Pain                                            | Familiar Pain                                   | RF                      |
| A. TMJ                | <input type="radio"/> N <input type="radio"/> Y | <input type="radio"/> N <input type="radio"/> Y | <input type="radio"/> R | A. TMJ                | <input type="radio"/> N <input type="radio"/> Y | <input type="radio"/> N <input type="radio"/> Y | <input type="radio"/> R |
| B. Trapezius          | <input type="radio"/> N <input type="radio"/> Y | <input type="radio"/> N <input type="radio"/> Y | <input type="radio"/> R | B. Trapezius          | <input type="radio"/> N <input type="radio"/> Y | <input type="radio"/> N <input type="radio"/> Y | <input type="radio"/> R |
| C. Supraspinatus      | <input type="radio"/> N <input type="radio"/> Y | <input type="radio"/> N <input type="radio"/> Y | <input type="radio"/> R | C. Supraspinatus      | <input type="radio"/> N <input type="radio"/> Y | <input type="radio"/> N <input type="radio"/> Y | <input type="radio"/> R |
| D. Second Rib         | <input type="radio"/> N <input type="radio"/> Y | <input type="radio"/> N <input type="radio"/> Y | <input type="radio"/> R | D. Second Rib         | <input type="radio"/> N <input type="radio"/> Y | <input type="radio"/> N <input type="radio"/> Y | <input type="radio"/> R |
| E. Lateral Epicondyle | <input type="radio"/> N <input type="radio"/> Y | <input type="radio"/> N <input type="radio"/> Y | <input type="radio"/> R | E. Lateral Epicondyle | <input type="radio"/> N <input type="radio"/> Y | <input type="radio"/> N <input type="radio"/> Y | <input type="radio"/> R |
| F. Gluteal            | <input type="radio"/> N <input type="radio"/> Y | <input type="radio"/> N <input type="radio"/> Y | <input type="radio"/> R | F. Gluteal            | <input type="radio"/> N <input type="radio"/> Y | <input type="radio"/> N <input type="radio"/> Y | <input type="radio"/> R |
| G. Greater Trochanter | <input type="radio"/> N <input type="radio"/> Y | <input type="radio"/> N <input type="radio"/> Y | <input type="radio"/> R | G. Greater Trochanter | <input type="radio"/> N <input type="radio"/> Y | <input type="radio"/> N <input type="radio"/> Y | <input type="radio"/> R |
| H. Knee               | <input type="radio"/> N <input type="radio"/> Y | <input type="radio"/> N <input type="radio"/> Y | <input type="radio"/> R | H. Knee               | <input type="radio"/> N <input type="radio"/> Y | <input type="radio"/> N <input type="radio"/> Y | <input type="radio"/> R |

RESPONDENT ID LABEL

17. Pressure Pain Thresholds

|                                 | RIGHT SIDE           |                      |                      |                      | LEFT SIDE            |                      |                      |                      |
|---------------------------------|----------------------|----------------------|----------------------|----------------------|----------------------|----------------------|----------------------|----------------------|
|                                 | Trial 1              |                      | Trial 2              |                      | Trial 1              |                      | Trial 2              |                      |
| A. Temporalis (anterior)        | <input type="text"/> |
| B. Masseter (body)              | <input type="text"/> |
| C. TMJ (lateral pole)           | <input type="text"/> |
| D. Trapezius (mid upper border) | <input type="text"/> |
| E. Lateral Epicondyle           | <input type="text"/> |

18. Physical Barrier(s) to Examination

Barriers  N  Y

If YES, specify:

19. Examination Comments

20. Research Classification (Choose one)

- Normal
- TMJD **→** GO TO 20A
- Neither Normal nor TMJD
- Uncertain

20A. TMJD Sub-Classification (complete if TMJD)

- A. Myalgia  N  Y
- B. Arthralgia  N  Y

21. Classification Comments
