# Supplementary material
Source: PubMed Central journal article supplement (PMC3443556)
Supplement: NIHMS331885-supplement-2.pdf [file NIHMS331885-supplement-2.pdf]

**Clinical Findings and Pain Symptoms as Potential Risk Factors for Chronic TMJD: Descriptive Data and Empirically Identified Domains**  
**from the OPPERA Case-Control Study**

Richard Ohrbach and OPPERA co-authors

Appendix B. Age, gender, and race/ethnic group variation in study measures among controls who do not have TMD.

Supplementary e-Table 1: Demographic group variation in etiologic conditions among controls who do not have TMD.

| Putative risk factor                  | Category   | Age = 18-24 yrs |          | Age = 25-34 yrs |          | Age = 35-44 yrs |          | P-value <sup>1</sup> |
|---------------------------------------|------------|-----------------|----------|-----------------|----------|-----------------|----------|----------------------|
|                                       |            | n               | column % | n               | column % | n               | column % |                      |
| Lifetime Hx of external injury to jaw | yes        | 75              | 9.5      | 37              | 8.6      | 14              | 4.5      | 0.0227               |
|                                       | no [ref]   | 717             | 90.5     | 392             | 91.4     | 299             | 95.5     |                      |
| Jaw injury due to yawning             | yes        | 16              | 1.9      | 15              | 3.3      | 13              | 3.8      | 0.1190               |
|                                       | no [ref]   | 818             | 98.1     | 434             | 96.7     | 327             | 96.2     |                      |
| Jaw injury due to prolonged opening   | yes        | 17              | 2.0      | 10              | 2.2      | 9               | 2.6      | 0.8134               |
|                                       | no [ref]   | 817             | 98.0     | 439             | 97.8     | 331             | 97.4     |                      |
| Ever had orthodontic procedures       | yes        | 439             | 52.8     | 178             | 39.7     | 77              | 22.6     | <0.0001              |
|                                       | no [ref]   | 392             | 47.2     | 270             | 60.3     | 263             | 77.4     |                      |
| Oral Behaviors Checklist: sum score   | 25-62      | 263             | 32.2     | 118             | 27.1     | 77              | 25.2     | 0.0068               |
|                                       | 17-24      | 268             | 32.8     | 157             | 36.0     | 89              | 29.2     |                      |
|                                       | 0-16 [ref] | 285             | 34.9     | 161             | 36.9     | 139             | 45.6     |                      |

1 – P-values are from Chi-square test of association between putative risk factor and age.

Supplementary e-Table 2: Gender variation in etiologic conditions among controls who do not have TMD.

| Putative risk factor                  | Category   | Female |          | Male |          | P-value <sup>1</sup> |
|---------------------------------------|------------|--------|----------|------|----------|----------------------|
|                                       |            | n      | column % | n    | column % |                      |
| Lifetime Hx of external injury to jaw | yes        | 64     | 7.3      | 62   | 9.4      | 0.1478               |
|                                       | no [ref]   | 809    | 92.7     | 599  | 90.6     |                      |
| Jaw injury due to yawning             | yes        | 24     | 2.6      | 20   | 2.8      | 0.7779               |
|                                       | no [ref]   | 895    | 97.4     | 684  | 97.2     |                      |
| Jaw injury due to prolonged opening   | yes        | 18     | 2.0      | 18   | 2.6      | 0.4174               |
|                                       | no [ref]   | 901    | 98.0     | 686  | 97.4     |                      |
| Ever had orthodontic procedures       | yes        | 419    | 45.6     | 275  | 39.2     | 0.0097               |
|                                       | no [ref]   | 499    | 54.4     | 426  | 60.8     |                      |
| Oral Behaviors Checklist: sum score   | 25-62      | 288    | 32.5     | 170  | 25.3     | <0.0001              |
|                                       | 17-24      | 319    | 36.0     | 195  | 29.1     |                      |
|                                       | 0-16 [ref] | 279    | 31.5     | 306  | 45.6     |                      |

1 – P-values are from Chi-square test of association between putative risk factor and gender.

Supplementary e-Table 3: Racial/ethnic group variation in etiologic conditions among controls who do not have TMD.

| Putative risk factor                  | Category   | Non-Hispanic White |          | Other |          | P-value <sup>1</sup> |
|---------------------------------------|------------|--------------------|----------|-------|----------|----------------------|
|                                       |            | n                  | column % | n     | column % |                      |
| Lifetime Hx of external injury to jaw | yes        | 84                 | 10.6     | 42    | 5.7      | 0.0003               |
|                                       | no [ref]   | 707                | 89.4     | 701   | 94.3     |                      |
| Jaw injury due to yawning             | yes        | 17                 | 2.0      | 27    | 3.4      | 0.0847               |
|                                       | no [ref]   | 818                | 98.0     | 761   | 96.6     |                      |
| Jaw injury due to prolonged opening   | yes        | 12                 | 1.4      | 24    | 3.0      | 0.0278               |
|                                       | no [ref]   | 823                | 98.6     | 764   | 97.0     |                      |
| Ever had orthodontic procedures       | yes        | 499                | 60.0     | 195   | 24.8     | <0.0001              |
|                                       | no [ref]   | 333                | 40.0     | 592   | 75.2     |                      |
| Oral Behaviors Checklist: sum score   | 25-62      | 246                | 30.0     | 212   | 28.8     | <0.0001              |
|                                       | 17-24      | 306                | 37.3     | 208   | 28.3     |                      |
|                                       | 0-16 [ref] | 269                | 32.8     | 316   | 42.9     |                      |

1 – P-values are from Chi-square test of association between putative risk factor and racial/ethnic group.

Supplementary e-Table 4: Demographic group variation in overlapping conditions among controls who do not have TMD..

| Putative risk factor                               | Category   | Age = 18-24 yrs |          | Age = 25-34 yrs |          | Age = 35-44 yrs |          | P-value <sup>1</sup> |
|----------------------------------------------------|------------|-----------------|----------|-----------------|----------|-----------------|----------|----------------------|
|                                                    |            | n               | column % | n               | column % | n               | column % |                      |
| Any headaches in last year                         | yes        | 626             | 75.3     | 323             | 71.9     | 229             | 67.0     | 0.0129               |
|                                                    | no [ref]   | 205             | 24.7     | 126             | 28.1     | 113             | 33.0     |                      |
| Number of different types of headache in last year | 4          | 60              | 7.3      | 47              | 10.5     | 44              | 13.1     | <0.0001              |
|                                                    | 3          | 74              | 8.9      | 42              | 9.4      | 31              | 9.2      |                      |
|                                                    | 2          | 200             | 24.2     | 114             | 25.6     | 78              | 23.1     |                      |
|                                                    | 1          | 288             | 34.8     | 117             | 26.2     | 71              | 21.1     |                      |
|                                                    | 0 [ref]    | 205             | 24.8     | 126             | 28.3     | 113             | 33.5     |                      |
| Chronic pain other than face                       | yes        | 83              | 10.1     | 67              | 15.1     | 51              | 15.7     | 0.0066               |
|                                                    | no [ref]   | 741             | 89.9     | 378             | 84.9     | 274             | 84.3     |                      |
| Current low back pain                              | yes        | 84              | 10.1     | 62              | 13.8     | 58              | 17.1     | 0.0032               |
|                                                    | no [ref]   | 747             | 89.9     | 386             | 86.2     | 282             | 82.9     |                      |
| Episodes of low back pain in last year             | 11 or more | 64              | 7.7      | 45              | 10.1     | 38              | 11.3     | 0.1091               |
|                                                    | 5-10       | 81              | 9.8      | 56              | 12.6     | 30              | 8.9      |                      |
|                                                    | 2-4        | 178             | 21.4     | 78              | 17.5     | 69              | 20.5     |                      |
|                                                    | 1          | 61              | 7.3      | 45              | 10.1     | 30              | 8.9      |                      |
|                                                    | 0 [ref]    | 446             | 53.7     | 222             | 49.8     | 170             | 50.4     |                      |
| ROME IBS classification                            | yes        | 22              | 2.7      | 15              | 3.4      | 6               | 1.8      | 0.4292               |
|                                                    | no [ref]   | 806             | 97.3     | 431             | 96.6     | 321             | 98.2     |                      |
| Count of 10 abdominal symptoms                     | 6 or more  | 47              | 5.7      | 28              | 6.3      | 32              | 9.5      | 0.0988               |
|                                                    | 3-5        | 128             | 15.4     | 78              | 17.4     | 63              | 18.8     |                      |
|                                                    | 1-2        | 163             | 19.7     | 97              | 21.7     | 68              | 20.2     |                      |
|                                                    | 0 [ref]    | 491             | 59.2     | 245             | 54.7     | 173             | 51.5     |                      |
| Genital symptoms                                   | yes        | 16              | 2.0      | 20              | 4.6      | 12              | 3.7      | 0.0284               |
|                                                    | no [ref]   | 798             | 98.0     | 418             | 95.4     | 312             | 96.3     |                      |
| Count of 20 comorbidities                          | 2 or more  | 77              | 9.3      | 84              | 18.8     | 84              | 24.9     | <0.0001              |
|                                                    | 1          | 156             | 18.9     | 91              | 20.4     | 51              | 15.1     |                      |
|                                                    | 0 [ref]    | 591             | 71.7     | 271             | 60.8     | 203             | 60.1     |                      |

1 – P-values are from Chi-square test of association between putative risk factor and age.

Supplementary e-Table 5: Gender variation in overlapping conditions among controls who do not have TMD.

| Putative risk factor                               | Category   | Female |          | Male |          | P-value <sup>1</sup> |
|----------------------------------------------------|------------|--------|----------|------|----------|----------------------|
|                                                    |            | n      | column % | n    | column % |                      |
| Any headaches in last year                         | yes        | 723    | 78.7     | 455  | 64.7     | <0.0001              |
|                                                    | no [ref]   | 196    | 21.3     | 248  | 35.3     |                      |
| Number of different types of headache in last year | 4          | 108    | 11.8     | 43   | 6.2      | <0.0001              |
|                                                    | 3          | 102    | 11.1     | 45   | 6.5      |                      |
|                                                    | 2          | 268    | 29.3     | 124  | 17.8     |                      |
|                                                    | 1          | 241    | 26.3     | 235  | 33.8     |                      |
|                                                    | 0 [ref]    | 196    | 21.4     | 248  | 35.7     |                      |
| Chronic pain other than face                       | yes        | 127    | 14.1     | 74   | 10.7     | 0.0435               |
|                                                    | no [ref]   | 775    | 85.9     | 618  | 89.3     |                      |
| Current low back pain                              | yes        | 120    | 13.0     | 84   | 12.0     | 0.5376               |
|                                                    | no [ref]   | 800    | 87.0     | 615  | 88.0     |                      |
| Episodes of low back pain in last year             | 11 or more | 88     | 9.6      | 59   | 8.5      | 0.1507               |
|                                                    | 5-10       | 102    | 11.1     | 65   | 9.4      |                      |
|                                                    | 2-4        | 199    | 21.6     | 126  | 18.2     |                      |
|                                                    | 1          | 77     | 8.4      | 59   | 8.5      |                      |
|                                                    | 0 [ref]    | 454    | 49.3     | 384  | 55.4     |                      |
| ROME IBS classification                            | yes        | 36     | 3.9      | 7    | 1.0      | 0.0003               |
|                                                    | no [ref]   | 877    | 96.1     | 681  | 99.0     |                      |
| Count of 10 abdominal symptoms                     | 6 or more  | 70     | 7.6      | 37   | 5.3      | 0.1233               |
|                                                    | 3-5        | 161    | 17.6     | 108  | 15.5     |                      |
|                                                    | 1-2        | 187    | 20.4     | 141  | 20.2     |                      |
|                                                    | 0 [ref]    | 498    | 54.4     | 411  | 59.0     |                      |
| Genital symptoms                                   | yes        | 41     | 4.6      | 7    | 1.0      | <0.0001              |
|                                                    | no [ref]   | 855    | 95.4     | 673  | 99.0     |                      |
| Count of 20 comorbidities                          | 2 or more  | 155    | 16.9     | 90   | 13.0     | 0.0029               |
|                                                    | 1          | 186    | 20.3     | 112  | 16.2     |                      |
|                                                    | 0 [ref]    | 574    | 62.7     | 491  | 70.9     |                      |

1 – P-values are from Chi-square test of association between putative risk factor and gender.

Supplementary e-Table 6: Racial/ethnic group variation in overlapping conditions among controls who do not have TMD.

| Putative risk factor                              | Category   | Non-Hispanic White |          | Other |          | P-value <sup>1</sup> |
|---------------------------------------------------|------------|--------------------|----------|-------|----------|----------------------|
|                                                   |            | n                  | column % | n     | column % |                      |
| Any headaches in last year                        | yes        | 638                | 76.6     | 540   | 68.4     | 0.0002               |
|                                                   | no [ref]   | 195                | 23.4     | 249   | 31.6     |                      |
| Number of different type of headache in last year | 4          | 67                 | 8.1      | 84    | 10.7     | 0.0004               |
|                                                   | 3          | 82                 | 9.9      | 65    | 8.3      |                      |
|                                                   | 2          | 214                | 25.9     | 178   | 22.7     |                      |
|                                                   | 1          | 268                | 32.4     | 208   | 26.5     |                      |
|                                                   | 0 [ref]    | 195                | 23.6     | 249   | 31.8     |                      |
| Chronic pain other than face                      | yes        | 125                | 15.1     | 76    | 9.9      | 0.0017               |
|                                                   | no [ref]   | 702                | 84.9     | 691   | 90.1     |                      |
| Current low back pain                             | yes        | 100                | 12.0     | 104   | 13.2     | 0.4804               |
|                                                   | no [ref]   | 731                | 88.0     | 684   | 86.8     |                      |
| Episodes of low back pain in last year            | 11 or more | 88                 | 10.6     | 59    | 7.5      | 0.0013               |
|                                                   | 5-10       | 96                 | 11.6     | 71    | 9.1      |                      |
|                                                   | 2-4        | 172                | 20.7     | 153   | 19.5     |                      |
|                                                   | 1          | 81                 | 9.8      | 55    | 7.0      |                      |
|                                                   | 0 [ref]    | 392                | 47.3     | 446   | 56.9     |                      |
| ROME IBS classification                           | yes        | 25                 | 3.0      | 18    | 2.3      | 0.4210               |
|                                                   | no [ref]   | 809                | 97.0     | 749   | 97.7     |                      |
| Count of 10 abdominal symptoms                    | 6 or more  | 44                 | 5.3      | 63    | 8.1      | <0.0001              |
|                                                   | 3-5        | 114                | 13.7     | 155   | 19.8     |                      |
|                                                   | 1-2        | 152                | 18.3     | 176   | 22.5     |                      |
|                                                   | 0 [ref]    | 521                | 62.7     | 388   | 49.6     |                      |
| Genital symptoms                                  | yes        | 26                 | 3.2      | 22    | 2.9      | 0.7703               |
|                                                   | no [ref]   | 795                | 96.8     | 733   | 97.1     |                      |
| Count of 20 comorbidities                         | 2 or more  | 155                | 16.9     | 90    | 13.0     | 0.0029               |
|                                                   | 1          | 186                | 20.3     | 112   | 16.2     |                      |
|                                                   | 0 [ref]    | 574                | 62.7     | 491   | 70.9     |                      |

1 – P-values are from Chi-square test of association between putative risk factor and racial/ethnic group.

Supplementary e-Table 7: Age group variation in self-reported pain and functional limitation of the jaw among controls who do not have TMD.

| Putative risk factor                              | Units and potential range | Age = 18-24 yrs |       |      | Age = 25-34 yrs |       |      | Age = 35-44 yrs |       |      | Site-adjusted P-value <sup>1</sup> |
|---------------------------------------------------|---------------------------|-----------------|-------|------|-----------------|-------|------|-----------------|-------|------|------------------------------------|
|                                                   |                           | n               | mean  | se   | n               | mean  | se   | n               | mean  | se   |                                    |
| Facial characteristic pain intensity <sup>2</sup> | 0-100                     | 103             | 15.18 | 1.42 | 78              | 13.21 | 1.72 | 66              | 19.49 | 2.81 | 0.2257                             |
| Facial pain interference <sup>2</sup>             | 0-10                      | 103             | 2.30  | 0.78 | 77              | 4.07  | 1.34 | 66              | 10.35 | 2.31 | 0.0329                             |
| Number days efficiency <50% <sup>2</sup>          | 0-180                     | 100             | 3.02  | 1.92 | 74              | 0.86  | 0.42 | 58              | 6.47  | 3.33 | 0.3101                             |
| JFLS Chewing Limitation                           | 0-10                      | 798             | 0.20  | 0.02 | 425             | 0.24  | 0.03 | 302             | 0.44  | 0.06 | 0.1127                             |
| JFLS Opening Limitation                           | 0-10                      | 811             | 0.13  | 0.02 | 437             | 0.16  | 0.03 | 317             | 0.20  | 0.04 | 0.9621                             |
| JFLS Verbal & Emotional Expression Limitation     | 0-10                      | 802             | 0.07  | 0.02 | 431             | 0.08  | 0.02 | 317             | 0.25  | 0.06 | 0.0469                             |
| JFLS Combined Global Measure                      | 0-10                      | 782             | 0.11  | 0.01 | 418             | 0.13  | 0.02 | 291             | 0.24  | 0.04 | 0.1438                             |

1 – P-values are from analysis of variance model comparing mean values of putative risk factor across categories of age.

2 – Computed only for subjects who reported pain.



Supplementary e-Table 8: Gender variation in self-reported pain and functional limitation of the jaw among controls who do not have TMD.

| Putative risk factor                              | Units and potential range | Female |       |      | Male |       |      | Site-adjusted        |
|---------------------------------------------------|---------------------------|--------|-------|------|------|-------|------|----------------------|
|                                                   |                           | n      | mean  | se   | n    | mean  | se   | P-value <sup>1</sup> |
| Facial characteristic pain intensity <sup>2</sup> | 0-100                     | 152    | 16.60 | 1.43 | 95   | 14.28 | 1.74 | 0.1701               |
| Facial pain interference <sup>2</sup>             | 0-10                      | 152    | 5.11  | 1.13 | 94   | 4.86  | 1.23 | 0.4879               |
| Number days efficiency <50% <sup>2</sup>          | 0-180                     | 146    | 3.18  | 1.41 | 86   | 3.22  | 2.14 | 0.8780               |
| JFLS Chewing Limitation                           | 0-10                      | 870    | 0.25  | 0.03 | 655  | 0.27  | 0.03 | 0.5766               |
| JFLS Opening Limitation                           | 0-10                      | 895    | 0.15  | 0.02 | 670  | 0.15  | 0.03 | 0.7022               |
| JFLS Verbal & Emotional Expression Limitation     | 0-10                      | 889    | 0.09  | 0.02 | 661  | 0.13  | 0.03 | 0.5559               |
| JFLS Combined Global Measure                      | 0-10                      | 854    | 0.13  | 0.01 | 637  | 0.16  | 0.02 | 0.4603               |

1 – P-values are from analysis of variance model comparing mean values of putative risk factor across categories of gender.

2 – Computed only for subjects who reported pain.

Supplementary e-Table 9: Racial/ethnic group variation in self-reported pain and functional limitation of the jaw among controls who do not have TMD.

| Putative risk factor                              | Units and potential range | White non-Hispanic |       |      | Other |       |      | Site-adjusted P-value <sup>2</sup> |
|---------------------------------------------------|---------------------------|--------------------|-------|------|-------|-------|------|------------------------------------|
|                                                   |                           | n                  | mean  | se   | n     | mean  | se   |                                    |
| Facial characteristic pain intensity <sup>2</sup> | 0-100                     | 138                | 13.57 | 1.15 | 109   | 18.41 | 2.02 | 0.1821                             |
| Facial pain interference <sup>2</sup>             | 0-100                     | 138                | 2.49  | 0.53 | 108   | 8.24  | 1.74 | 0.0574                             |
| Number days efficiency <50% <sup>2</sup>          | 0-180                     | 137                | 2.46  | 1.42 | 95    | 4.25  | 2.05 | 0.7086                             |
| JFLS Chewing Limitation                           | 0-10                      | 817                | 0.15  | 0.02 | 708   | 0.38  | 0.04 | 0.0001                             |
| JFLS Opening Limitation                           | 0-10                      | 823                | 0.08  | 0.01 | 742   | 0.23  | 0.03 | 0.0015                             |
| JFLS Verbal & Emotional Expression Limitation     | 0-10                      | 813                | 0.04  | 0.01 | 737   | 0.19  | 0.03 | 0.0031                             |
| JFLS Combined Global Measure                      | 0-10                      | 803                | 0.09  | 0.01 | 688   | 0.21  | 0.02 | 0.0009                             |

1 – P-values are from analysis of variance model comparing mean values of putative risk factor across categories of race/ethnicity.

2 – Computed only for subjects who reported pain.

Supplementary e-Table 10: Age group variation in self-reported pain-related disability, factors that modify pain, and non-pain characteristics among controls who do not have TMD.

| Putative risk factor                                                   | Category  | Age = 18-24 yrs |          | Age = 25-34 yrs |          | Age = 35-44 yrs |          | P-value <sup>1</sup> |
|------------------------------------------------------------------------|-----------|-----------------|----------|-----------------|----------|-----------------|----------|----------------------|
|                                                                        |           | n               | column % | n               | column % | n               | column % |                      |
| Facial Graded Chronic Pain Status <sup>2</sup>                         | 2.5-4     | 2               | 2.7      | 1               | 2.1      | 8               | 20.5     | 0.0007               |
|                                                                        | 2         | 0               | 0.0      | 1               | 2.1      | 2               | 5.1      |                      |
|                                                                        | 1 [ref]   | 72              | 97.3     | 45              | 95.7     | 29              | 74.4     |                      |
| Number of activities that modified facial pain last month <sup>2</sup> | 4-5       | 2               | 8.7      | 3               | 27.3     | 2               | 10.0     | 0.5697               |
|                                                                        | 2-3       | 10              | 43.5     | 4               | 36.4     | 7               | 35.0     |                      |
|                                                                        | 0-1 [ref] | 11              | 47.8     | 4               | 36.4     | 11              | 55.0     |                      |
| Number of face/jaw symptoms                                            | 3 or more | 32              | 3.8      | 16              | 3.6      | 30              | 8.8      | 0.0005               |
|                                                                        | 0-2 [ref] | 800             | 96.2     | 434             | 96.4     | 312             | 91.2     |                      |

1 – P-values are from Chi-square test of association between putative risk factor and age.

2 – Computed only for subjects who reported pain.

Supplementary e-Table 11: Gender variation in self-reported pain-related disability, factors that modify pain, and non-pain characteristics among controls who do not have TMD.

| Putative risk factor                                                   | Category  | Female |          | Male |          | P-value <sup>1</sup> |
|------------------------------------------------------------------------|-----------|--------|----------|------|----------|----------------------|
|                                                                        |           | n      | column % | n    | column % |                      |
| Facial Graded Chronic Pain Status <sup>2</sup>                         | 2.5-4     | 8      | 7.9      | 3    | 5.1      | 0.7820               |
|                                                                        | 2         | 2      | 2.0      | 1    | 1.7      |                      |
|                                                                        | 1 [ref]   | 91     | 90.1     | 55   | 93.2     |                      |
| Number of activities that modified facial pain last month <sup>2</sup> | 4-5       | 3      | 8.1      | 4    | 23.5     | 0.2207               |
|                                                                        | 2-3       | 14     | 37.8     | 7    | 41.2     |                      |
|                                                                        | 0-1 [ref] | 20     | 54.1     | 6    | 35.3     |                      |
| Number of face/jaw symptoms                                            | 3 or more | 48     | 5.2      | 30   | 4.3      | 0.3660               |
|                                                                        | 0-2 [ref] | 871    | 94.8     | 675  | 95.7     |                      |

1 – P-values are from Chi-square test of association between putative risk factor and gender.

2 – Computed only for subjects who reported pain.

Supplementary e-Table 12: Racial/ethnic group variation in self-reported pain-related disability, factors that modify pain, and non-pain characteristics among controls who do not have TMD.

| Putative risk factor                                                   | Category  | Non-Hispanic White |          | Other |          | P-value <sup>1</sup> |
|------------------------------------------------------------------------|-----------|--------------------|----------|-------|----------|----------------------|
|                                                                        |           | n                  | column % | n     | column % |                      |
| Facial Graded Chronic Pain Status <sup>2</sup>                         | 2.5-4     | 2                  | 2.1      | 9     | 13.8     | 0.0013               |
|                                                                        | 2         | 0                  | 0.0      | 3     | 4.6      |                      |
|                                                                        | 1 [ref]   | 93                 | 97.9     | 53    | 81.5     |                      |
| Number of activities that modified facial pain last month <sup>2</sup> | 4-5       | 3                  | 10.0     | 4     | 16.7     | 0.6600               |
|                                                                        | 2-3       | 13                 | 43.3     | 8     | 33.3     |                      |
|                                                                        | 0-1 [ref] | 14                 | 46.7     | 12    | 50.0     |                      |
| Number of face/jaw symptoms                                            | 3 or more | 37                 | 4.4      | 41    | 5.2      | 0.4778               |
|                                                                        | 0-2 [ref] | 797                | 95.6     | 749   | 94.8     |                      |

1 – P-values are from Chi-square test of association between putative risk factor and racial/ethnic group.

2 – Computed only for subjects who reported pain.

Supplementary e-Table 13: Age group variation in self-reported jaw clicking and jaw locking among controls who do not have TMD.

| Putative risk factor                                                | Category  | Age = 18-24 yrs |          | Age = 25-34 yrs |          | Age = 35-44 yrs |          | P-value <sup>1</sup> |
|---------------------------------------------------------------------|-----------|-----------------|----------|-----------------|----------|-----------------|----------|----------------------|
|                                                                     |           | n               | column % | n               | column % | n               | column % |                      |
| TMJ noises in last month                                            | 1 or more | 161             | 19.5     | 82              | 18.4     | 54              | 16.3     | 0.4465               |
|                                                                     | 0 [ref]   | 664             | 80.5     | 364             | 81.6     | 277             | 83.7     |                      |
| Pain with TMJ noises in last month                                  | no [ref]  | 814             | 98.9     | 438             | 99.1     | 318             | 96.7     | 0.0086               |
|                                                                     | yes       | 9               | 1.1      | 4               | 0.9      | 11              | 3.3      |                      |
| TMJ noises before last month                                        | 1 or more | 177             | 21.4     | 98              | 21.9     | 63              | 18.8     | 0.5266               |
|                                                                     | 0 [ref]   | 650             | 78.6     | 349             | 78.1     | 272             | 81.2     |                      |
| In last month, could not open mouth wide                            | yes       | 13              | 1.6      | 12              | 2.7      | 10              | 2.9      | 0.2302               |
|                                                                     | no [ref]  | 816             | 98.4     | 436             | 97.3     | 329             | 97.1     |                      |
| Prior to one month ago, could not open mouth wide                   | yes       | 52              | 6.3      | 30              | 6.7      | 27              | 8.1      | 0.5295               |
|                                                                     | no [ref]  | 774             | 93.7     | 418             | 93.3     | 305             | 91.9     |                      |
| In the last month, could not close jaw from wide-open position      | yes       | 15              | 1.8      | 10              | 2.2      | 10              | 3.0      | 0.4429               |
|                                                                     | no [ref]  | 810             | 98.2     | 439             | 97.8     | 320             | 97.0     |                      |
| Prior to one month ago, could not close jaw from wide-open position | yes       | 35              | 4.2      | 22              | 4.9      | 17              | 5.1      | 0.7607               |
|                                                                     | no [ref]  | 793             | 95.8     | 424             | 95.1     | 318             | 94.9     |                      |

1 – P-values are from Chi-square test of association between putative risk factor and age.

Supplementary e-Table 14: Gender variation in self-reported jaw clicking and jaw locking among controls who do not have TMD.

| Putative risk factor                                                | Category  | Female |          | Male |          | P-value <sup>1</sup> |
|---------------------------------------------------------------------|-----------|--------|----------|------|----------|----------------------|
|                                                                     |           | n      | column % | n    | column % |                      |
| TMJ noises in last month                                            | 1 or more | 182    | 20.0     | 115  | 16.7     | 0.0934               |
|                                                                     | 0 [ref]   | 730    | 80.0     | 575  | 83.3     |                      |
| Pain with TMJ noises in last month                                  | no [ref]  | 895    | 98.7     | 675  | 98.3     | 0.4915               |
|                                                                     | yes       | 12     | 1.3      | 12   | 1.7      |                      |
| TMJ noises before last month                                        | 1 or more | 209    | 22.9     | 129  | 18.5     | 0.0294               |
|                                                                     | 0 [ref]   | 702    | 77.1     | 569  | 81.5     |                      |
| In last month, could not open mouth wide                            | yes       | 22     | 2.4      | 13   | 1.9      | 0.4561               |
|                                                                     | no [ref]  | 894    | 97.6     | 687  | 98.1     |                      |
| Prior to one month ago, could not open mouth wide                   | yes       | 72     | 7.9      | 37   | 5.3      | 0.0430               |
|                                                                     | no [ref]  | 840    | 92.1     | 657  | 94.7     |                      |
| In the last month, could not close jaw from wide-open position      | yes       | 24     | 2.6      | 11   | 1.6      | 0.1550               |
|                                                                     | no [ref]  | 887    | 97.4     | 682  | 98.4     |                      |
| Prior to one month ago, could not close jaw from wide-open position | yes       | 45     | 4.9      | 29   | 4.2      | 0.4696               |
|                                                                     | no [ref]  | 868    | 95.1     | 667  | 95.8     |                      |

1 – P-values are from Chi-square test of association between putative risk factor and gender.

Supplementary e-Table 15: Racial/ethnic group variation in self-reported jaw clicking and jaw locking among controls who do not have TMD.

| Putative risk factor                                                | Category  | Non-Hispanic White |          | Other |          | P-value <sup>1</sup> |
|---------------------------------------------------------------------|-----------|--------------------|----------|-------|----------|----------------------|
|                                                                     |           | n                  | column % | n     | column % |                      |
| TMJ noises in last month                                            | 1 or more | 193                | 23.3     | 104   | 13.4     | <0.0001              |
|                                                                     | 0 [ref]   | 635                | 76.7     | 670   | 86.6     |                      |
| Pain with TMJ noises in last month                                  | no [ref]  | 817                | 99.2     | 753   | 97.8     | 0.0260               |
|                                                                     | yes       | 7                  | 0.8      | 17    | 2.2      |                      |
| TMJ noises before last month                                        | 1 or more | 231                | 27.8     | 107   | 13.7     | <0.0001              |
|                                                                     | 0 [ref]   | 599                | 72.2     | 672   | 86.3     |                      |
| In last month, could not open mouth wide                            | yes       | 14                 | 1.7      | 21    | 2.7      | 0.1692               |
|                                                                     | no [ref]  | 818                | 98.3     | 763   | 97.3     |                      |
| Prior to one month ago, could not open mouth wide                   | yes       | 69                 | 8.3      | 40    | 5.2      | 0.0123               |
|                                                                     | no [ref]  | 762                | 91.7     | 735   | 94.8     |                      |
| In the last month, could not close jaw from wide-open position      | yes       | 19                 | 2.3      | 16    | 2.1      | 0.7724               |
|                                                                     | no [ref]  | 813                | 97.7     | 756   | 97.9     |                      |
| Prior to one month ago, could not close jaw from wide-open position | yes       | 47                 | 5.7      | 27    | 3.5      | 0.0336               |
|                                                                     | no [ref]  | 781                | 94.3     | 754   | 96.5     |                      |

1 – P-values are from Chi-square test of association between putative risk factor and racial/ethnic group.



Supplementary e-Table 16: Age group variation in clinical jaw mobility and body palpation scores among controls who do not have TMD.

| Putative risk factor                     | Units and potential range | Age = 18-24 yrs |       |      | Age = 25-34 yrs |       |      | Age = 35-44 yrs |       |      | Site-adjusted P-value <sup>1</sup> |
|------------------------------------------|---------------------------|-----------------|-------|------|-----------------|-------|------|-----------------|-------|------|------------------------------------|
|                                          |                           | n               | mean  | se   | n               | mean  | se   | n               | mean  | se   |                                    |
| Pain-free jaw opening                    | mm                        | 838             | 48.37 | 0.26 | 450             | 47.35 | 0.35 | 329             | 46.85 | 0.41 | 0.0009                             |
| Max. unassisted jaw opening              | mm                        | 838             | 53.98 | 0.24 | 450             | 52.94 | 0.33 | 329             | 52.09 | 0.39 | <0.0001                            |
| Max. assisted jaw opening (unterminated) | mm                        | 613             | 56.64 | 0.30 | 375             | 55.43 | 0.35 | 272             | 55.03 | 0.43 | <0.0001                            |
| Max. assisted jaw opening (terminated)   | mm                        | 223             | 56.91 | 0.50 | 73              | 56.19 | 0.94 | 51              | 52.14 | 0.86 | 0.0003                             |
| Number of neck sites tender to palpation | 0-14                      | 838             | 1.43  | 0.10 | 451             | 0.94  | 0.10 | 344             | 0.89  | 0.13 | 0.0984                             |
| Number of body sites tender to palpation | 0-14                      | 838             | 2.51  | 0.10 | 451             | 1.96  | 0.14 | 344             | 1.44  | 0.15 | 0.7252                             |

1 – P-values are from analysis of variance model comparing mean values of putative risk factor across categories of age.

Supplementary e-Table 17: Gender variation in clinical jaw mobility and body palpation scores among controls who do not have TMD.

| Putative risk factor                     | Units and potential range | Female |       |      | Male |       |      | Site-adjusted P-value <sup>1</sup> |
|------------------------------------------|---------------------------|--------|-------|------|------|-------|------|------------------------------------|
|                                          |                           | n      | mean  | se   | n    | mean  | se   |                                    |
| Pain-free jaw opening                    | mm                        | 913    | 46.40 | 0.23 | 704  | 49.56 | 0.30 | <0.0001                            |
| Max. unassisted jaw opening              | mm                        | 913    | 51.74 | 0.21 | 704  | 55.34 | 0.28 | <0.0001                            |
| Max. assisted jaw opening (unterminated) | mm                        | 691    | 54.50 | 0.26 | 569  | 57.67 | 0.31 | <0.0001                            |
| Max. assisted jaw opening (terminated)   | mm                        | 216    | 54.76 | 0.45 | 131  | 58.18 | 0.75 | <0.0001                            |
| Number of neck sites tender to palpation | 0-14                      | 925    | 1.45  | 0.10 | 708  | 0.84  | 0.08 | <0.0001                            |
| Number of body sites tender to palpation | 0-14                      | 925    | 2.59  | 0.11 | 708  | 1.53  | 0.09 | <0.0001                            |

1 – P-values are from analysis of variance model comparing mean values of putative risk factor across categories of gender.

Supplementary e-Table 18: Racial/ethnic group variation in clinical jaw mobility and body palpation scores among controls who do not have TMD.

| Putative risk factor                     | Units and potential range | White non-Hispanic |       |      | Other |       |      | Fully-adjusted       |
|------------------------------------------|---------------------------|--------------------|-------|------|-------|-------|------|----------------------|
|                                          |                           | n                  | mean  | se   | n     | mean  | se   | P-value <sup>1</sup> |
| Pain-free jaw opening                    | mm                        | 839                | 47.09 | 0.24 | 778   | 48.52 | 0.29 | <0.0001              |
| Max. unassisted jaw opening              | mm                        | 839                | 52.45 | 0.24 | 778   | 54.24 | 0.26 | <0.0001              |
| Max. assisted jaw opening (unterminated) | mm                        | 651                | 54.79 | 0.28 | 609   | 57.15 | 0.29 | <0.0001              |
| Max. assisted jaw opening (terminated)   | mm                        | 183                | 55.73 | 0.55 | 164   | 56.41 | 0.61 | 0.2639               |
| Number of neck sites tender to palpation | 0-14                      | 839                | 1.30  | 0.09 | 794   | 1.06  | 0.09 | 0.8134               |
| Number of body sites tender to palpation | 0-14                      | 839                | 2.32  | 0.10 | 794   | 1.94  | 0.10 | 0.3514               |

1 – P-values are from analysis of variance model comparing mean values of putative risk factor across categories of race/ethnicity.

Supplementary e-Table 19: Age group variation in clinical pain with opening, TMJ sounds, and bruxofacets among controls who do not have TMD.

| Putative risk factor                    | Category  | Age = 18-24 yrs |          | Age = 25-34 yrs |          | Age = 35-44 yrs |          | P-value <sup>1</sup> |
|-----------------------------------------|-----------|-----------------|----------|-----------------|----------|-----------------|----------|----------------------|
|                                         |           | n               | column % | n               | column % | n               | column % |                      |
| Pain on unassisted opening              | 1 or more | 385             | 46.4     | 146             | 32.7     | 80              | 24.9     | <0.0001              |
|                                         | 0 [ref]   | 445             | 53.6     | 300             | 67.3     | 241             | 75.1     |                      |
| Pain on assisted opening (unterminated) | 1 or more | 231             | 38.3     | 100             | 27.0     | 58              | 21.9     | <0.0001              |
|                                         | 0 [ref]   | 372             | 61.7     | 270             | 73.0     | 207             | 78.1     |                      |
| Pain on assisted opening (terminated)   | 1 or more | 181             | 81.9     | 49              | 69.0     | 32              | 62.7     | 0.0038               |
|                                         | 0 [ref]   | 40              | 18.1     | 22              | 31.0     | 19              | 37.3     |                      |
| TMJ palpation sounds: right             | 1 or more | 271             | 32.5     | 122             | 27.3     | 95              | 28.2     | 0.1007               |
|                                         | 0 [ref]   | 562             | 67.5     | 325             | 72.7     | 242             | 71.8     |                      |
| TMJ palpation sounds: left              | 1 or more | 297             | 35.7     | 151             | 33.8     | 77              | 22.8     | <0.0001              |
|                                         | 0 [ref]   | 536             | 64.3     | 296             | 66.2     | 260             | 77.2     |                      |
| Number of locations with bruxo-facets   | 2-3       | 613             | 73.4     | 343             | 76.4     | 277             | 85.0     | 0.0001               |
|                                         | 0-1 [ref] | 222             | 26.6     | 106             | 23.6     | 49              | 15.0     |                      |

1 – P-values are from Chi-square test of association between putative risk factor and age.

Supplementary e-Table 20: Gender variation in clinical pain with opening, TMJ sounds, and bruxofacets among controls who do not have TMD.

| Putative risk factor                    | Category  | Female |          | Male |          | P-value <sup>1</sup> |
|-----------------------------------------|-----------|--------|----------|------|----------|----------------------|
|                                         |           | n      | column % | n    | column % |                      |
| Pain on unassisted opening              | 1 or more | 339    | 37.6     | 272  | 39.1     | 0.5265               |
|                                         | 0 [ref]   | 563    | 62.4     | 423  | 60.9     |                      |
| Pain on assisted opening (unterminated) | 1 or more | 191    | 28.2     | 198  | 35.3     | 0.0075               |
|                                         | 0 [ref]   | 486    | 71.8     | 363  | 64.7     |                      |
| Pain on assisted opening (terminated)   | 1 or more | 163    | 76.2     | 99   | 76.7     | 0.9031               |
|                                         | 0 [ref]   | 51     | 23.8     | 30   | 23.3     |                      |
| TMJ palpation sounds: right             | 1 or more | 287    | 31.3     | 201  | 28.8     | 0.2763               |
|                                         | 0 [ref]   | 631    | 68.7     | 498  | 71.2     |                      |
| TMJ palpation sounds: left              | 1 or more | 335    | 36.5     | 190  | 27.2     | <0.0001              |
|                                         | 0 [ref]   | 583    | 63.5     | 509  | 72.8     |                      |
| Number of locations with bruxo-facets   | 2-3       | 680    | 75.1     | 553  | 78.4     | 0.1206               |
|                                         | 0-1 [ref] | 225    | 24.9     | 152  | 21.6     |                      |

1 – P-values are from Chi-square test of association between putative risk factor and gender.

Supplementary e-Table 21: Racial/ethnic group variation in clinical pain with opening, TMJ sounds, and bruxofacets among controls who do not have TMD.

| Putative risk factor                    | Category  | Non-Hispanic White |          | Other |          | P-value <sup>1</sup> |
|-----------------------------------------|-----------|--------------------|----------|-------|----------|----------------------|
|                                         |           | n                  | column % | n     | column % |                      |
| Pain on unassisted opening              | 1 or more | 361                | 43.4     | 250   | 32.7     | <0.0001              |
|                                         | 0 [ref]   | 471                | 56.6     | 515   | 67.3     |                      |
| Pain on assisted opening (unterminated) | 1 or more | 223                | 34.6     | 166   | 27.9     | 0.0114               |
|                                         | 0 [ref]   | 421                | 65.4     | 428   | 72.1     |                      |
| Pain on assisted opening (terminated)   | 1 or more | 145                | 80.1     | 117   | 72.2     | 0.0859               |
|                                         | 0 [ref]   | 36                 | 19.9     | 45    | 27.8     |                      |
| TMJ palpation sounds: right             | 1 or more | 284                | 34.1     | 204   | 26.1     | 0.0004               |
|                                         | 0 [ref]   | 550                | 65.9     | 579   | 73.9     |                      |
| TMJ palpation sounds: left              | 1 or more | 309                | 37.1     | 216   | 27.6     | <0.0001              |
|                                         | 0 [ref]   | 525                | 62.9     | 567   | 72.4     |                      |
| Number of locations with bruxo-facets   | 2-3       | 630                | 75.4     | 603   | 77.8     | 0.2644               |
|                                         | 0-1 [ref] | 205                | 24.6     | 172   | 22.2     |                      |

1 – P-values are from Chi-square test of association between putative risk factor and racial/ethnic group.

Supplementary e-Table 22: Age group variation in clinical palpation characteristics of masticatory muscles among controls who do not have TMD.

| Putative risk factor              | Category  | Age = 18-24 yrs |          | Age = 25-34 yrs |          | Age = 35-44 yrs |          | P-value <sup>1</sup> |
|-----------------------------------|-----------|-----------------|----------|-----------------|----------|-----------------|----------|----------------------|
|                                   |           | n               | column % | n               | column % | n               | column % |                      |
| <b>RIGHT SIDE</b>                 |           |                 |          |                 |          |                 |          |                      |
| Temporalis                        | 1 or more | 225             | 26.8     | 110             | 24.4     | 77              | 22.4     | 0.2452               |
|                                   | 0 [ref]   | 613             | 73.2     | 341             | 75.6     | 267             | 77.6     |                      |
| Masseter                          | 1 or more | 260             | 31.0     | 127             | 28.2     | 87              | 25.3     | 0.1273               |
|                                   | 0 [ref]   | 578             | 69.0     | 324             | 71.8     | 257             | 74.7     |                      |
| Posterior and inferior mandibular | 1 or more | 128             | 15.3     | 70              | 15.5     | 38              | 11.0     | 0.1285               |
|                                   | 0 [ref]   | 710             | 84.7     | 381             | 84.5     | 306             | 89.0     |                      |
| Lateral pterygoid                 | 1 or more | 169             | 20.2     | 79              | 17.5     | 55              | 16.0     | 0.2016               |
|                                   | 0 [ref]   | 669             | 79.8     | 372             | 82.5     | 288             | 84.0     |                      |
| TM joint                          | 1 or more | 112             | 13.4     | 36              | 8.0      | 22              | 6.4      | 0.0002               |
|                                   | 0 [ref]   | 726             | 86.6     | 415             | 92.0     | 322             | 93.6     |                      |
| <b>LEFT SIDE</b>                  |           |                 |          |                 |          |                 |          |                      |
| Temporalis                        | 1 or more | 197             | 23.5     | 84              | 18.6     | 66              | 19.2     | 0.0711               |
|                                   | 0 [ref]   | 641             | 76.5     | 367             | 81.4     | 278             | 80.8     |                      |
| Masseter                          | 1 or more | 234             | 27.9     | 111             | 24.6     | 72              | 20.9     | 0.0377               |
|                                   | 0 [ref]   | 604             | 72.1     | 340             | 75.4     | 272             | 79.1     |                      |
| Posterior and inferior mandibular | 1 or more | 113             | 13.5     | 71              | 15.7     | 38              | 11.0     | 0.1586               |
|                                   | 0 [ref]   | 725             | 86.5     | 380             | 84.3     | 306             | 89.0     |                      |
| Lateral pterygoid                 | 1 or more | 175             | 20.9     | 73              | 16.2     | 51              | 14.9     | 0.0209               |
|                                   | 0 [ref]   | 663             | 79.1     | 377             | 83.8     | 292             | 85.1     |                      |
| TM joint                          | 1 or more | 131             | 15.6     | 41              | 9.1      | 22              | 6.4      | <0.0001              |
|                                   | 0 [ref]   | 707             | 84.4     | 410             | 90.9     | 322             | 93.6     |                      |

1 – P-values are from Chi-square test of association between putative risk factor and age.

Supplementary e-Table 23: Gender variation in clinical palpation characteristics of masticatory muscles among controls who do not have TMD.

| Putative risk factor              | Category  | Female |          | Male |          | P-value <sup>1</sup> |
|-----------------------------------|-----------|--------|----------|------|----------|----------------------|
|                                   |           | n      | column % | n    | column % |                      |
| RIGHT SIDE                        |           |        |          |      |          |                      |
| Temporalis                        | 1 or more | 261    | 28.2     | 151  | 21.3     | 0.0014               |
|                                   | 0 [ref]   | 664    | 71.8     | 557  | 78.7     |                      |
| Masseter                          | 1 or more | 293    | 31.7     | 181  | 25.6     | 0.0070               |
|                                   | 0 [ref]   | 632    | 68.3     | 527  | 74.4     |                      |
| Posterior and inferior mandibular | 1 or more | 144    | 15.6     | 92   | 13.0     | 0.1427               |
|                                   | 0 [ref]   | 781    | 84.4     | 616  | 87.0     |                      |
| Lateral pterygoid                 | 1 or more | 186    | 20.1     | 117  | 16.5     | 0.0668               |
|                                   | 0 [ref]   | 739    | 79.9     | 590  | 83.5     |                      |
| TM joint                          | 1 or more | 106    | 11.5     | 64   | 9.0      | 0.1125               |
|                                   | 0 [ref]   | 819    | 88.5     | 644  | 91.0     |                      |
| LEFT SIDE                         |           |        |          |      |          |                      |
| Temporalis                        | 1 or more | 227    | 24.5     | 120  | 16.9     | 0.0002               |
|                                   | 0 [ref]   | 698    | 75.5     | 588  | 83.1     |                      |
| Masseter                          | 1 or more | 260    | 28.1     | 157  | 22.2     | 0.0064               |
|                                   | 0 [ref]   | 665    | 71.9     | 551  | 77.8     |                      |
| Posterior and inferior mandibular | 1 or more | 130    | 14.1     | 92   | 13.0     | 0.5357               |
|                                   | 0 [ref]   | 795    | 85.9     | 616  | 87.0     |                      |
| Lateral pterygoid                 | 1 or more | 180    | 19.5     | 119  | 16.8     | 0.1706               |
|                                   | 0 [ref]   | 744    | 80.5     | 588  | 83.2     |                      |
| TM joint                          | 1 or more | 114    | 12.3     | 80   | 11.3     | 0.5258               |
|                                   | 0 [ref]   | 811    | 87.7     | 628  | 88.7     |                      |

1 – P-values are from Chi-square test of association between putative risk factor and gender.



Supplementary e-Table 24: Racial/ethnic group variation in clinical palpation characteristics of masticatory muscles among controls who do not have TMD.

| Putative risk factor              | Category  | Non-Hispanic White |          | Other |          | P-value <sup>1</sup> |
|-----------------------------------|-----------|--------------------|----------|-------|----------|----------------------|
|                                   |           | n                  | column % | n     | column % |                      |
| <b>RIGHT SIDE</b>                 |           |                    |          |       |          |                      |
| Temporalis                        | 1 or more | 224                | 26.7     | 188   | 23.7     | 0.1600               |
|                                   | 0 [ref]   | 615                | 73.3     | 606   | 76.3     |                      |
| Masseter                          | 1 or more | 268                | 31.9     | 206   | 25.9     | 0.0076               |
|                                   | 0 [ref]   | 571                | 68.1     | 588   | 74.1     |                      |
| Posterior and inferior mandibular | 1 or more | 141                | 16.8     | 95    | 12.0     | 0.0054               |
|                                   | 0 [ref]   | 698                | 83.2     | 699   | 88.0     |                      |
| Lateral pterygoid                 | 1 or more | 154                | 18.4     | 149   | 18.8     | 0.8400               |
|                                   | 0 [ref]   | 684                | 81.6     | 645   | 81.2     |                      |
| TM joint                          | 1 or more | 97                 | 11.6     | 73    | 9.2      | 0.1174               |
|                                   | 0 [ref]   | 742                | 88.4     | 721   | 90.8     |                      |
| <b>LEFT SIDE</b>                  |           |                    |          |       |          |                      |
| Temporalis                        | 1 or more | 180                | 21.5     | 167   | 21.0     | 0.8351               |
|                                   | 0 [ref]   | 659                | 78.5     | 627   | 79.0     |                      |
| Masseter                          | 1 or more | 228                | 27.2     | 189   | 23.8     | 0.1183               |
|                                   | 0 [ref]   | 611                | 72.8     | 605   | 76.2     |                      |
| Posterior and inferior mandibular | 1 or more | 125                | 14.9     | 97    | 12.2     | 0.1139               |
|                                   | 0 [ref]   | 714                | 85.1     | 697   | 87.8     |                      |
| Lateral pterygoid                 | 1 or more | 151                | 18.0     | 148   | 18.7     | 0.7368               |
|                                   | 0 [ref]   | 687                | 82.0     | 645   | 81.3     |                      |
| TM joint                          | 1 or more | 108                | 12.9     | 86    | 10.8     | 0.2025               |
|                                   | 0 [ref]   | 731                | 87.1     | 708   | 89.2     |                      |

1 – P-values are from Chi-square test of association between putative risk factor and racial/ethnic group.

Supplementary e-Table 25: Age group variation in clinical anthropometric measures among controls who do not have TMD.

| Putative risk factor                        | Units and potential range | Age = 18-24 yrs |       |      | Age = 25-34 yrs |       |      | Age = 35-44 yrs |       |      | Site-adjusted P-value <sup>1</sup> |
|---------------------------------------------|---------------------------|-----------------|-------|------|-----------------|-------|------|-----------------|-------|------|------------------------------------|
|                                             |                           | n               | mean  | se   | n               | mean  | se   | n               | mean  | se   |                                    |
| Height                                      | m                         | 908             | 1.70  | 0.00 | 509             | 1.70  | 0.00 | 390             | 1.70  | 0.00 | 0.1154                             |
| Weight                                      | kg                        | 904             | 71.98 | 0.59 | 505             | 78.66 | 0.92 | 391             | 83.68 | 1.17 | <0.0001                            |
| Body mass index                             | kg/m-squared              | 903             | 24.86 | 0.17 | 503             | 27.18 | 0.30 | 388             | 29.06 | 0.37 | <0.0001                            |
| Left-hand finger length ratio (Index:Ring)  | mm                        | 909             | 96.36 | 0.11 | 508             | 96.65 | 0.16 | 390             | 96.05 | 0.20 | 0.2120                             |
| Right-hand finger length ratio (Index:Ring) | mm                        | 909             | 95.96 | 0.12 | 508             | 96.45 | 0.16 | 390             | 96.07 | 0.19 | 0.0516                             |

1 – P-values are from analysis of variance model comparing mean values of putative risk factor across categories of age.

Supplementary e-Table 26: Gender variation in clinical anthropometric measures findings among controls who do not have TMD.

| Putative risk factor                        | Units and potential range | Female |       |      | Male |       |      | Site-adjusted        |
|---------------------------------------------|---------------------------|--------|-------|------|------|-------|------|----------------------|
|                                             |                           | n      | mean  | se   | n    | mean  | se   | P-value <sup>1</sup> |
| Height                                      | m                         | 733    | 1.78  | 0.00 | 1074 | 1.64  | 0.00 | <0.0001              |
| Weight                                      | kg                        | 731    | 83.88 | 0.71 | 1069 | 71.28 | 0.60 | <0.0001              |
| Body mass index                             | kg/m-squared              | 728    | 26.49 | 0.21 | 1066 | 26.37 | 0.21 | 0.7618               |
| Left-hand finger length ratio (Index:Ring)  | mm                        | 734    | 95.57 | 0.13 | 1073 | 96.92 | 0.11 | <0.0001              |
| Right-hand finger length ratio (Index:Ring) | mm                        | 734    | 95.29 | 0.13 | 1073 | 96.69 | 0.11 | <0.0001              |

1 – P-values are from analysis of variance model comparing mean values of putative risk factor across categories of gender.

Supplementary e-Table 27: Racial/ethnic group variation in clinical anthropometric measures findings among controls who do not have TMD.

| Putative risk factor                        | Units and potential range | White non-Hispanic |       |      | Other |       |      | Site-adjusted P-value <sup>2</sup> |
|---------------------------------------------|---------------------------|--------------------|-------|------|-------|-------|------|------------------------------------|
|                                             |                           | n                  | mean  | se   | n     | mean  | se   |                                    |
| Height                                      | m                         | 981                | 1.70  | 0.00 | 826   | 1.69  | 0.00 | <0.0001                            |
| Weight                                      | kg                        | 972                | 73.99 | 0.59 | 828   | 79.22 | 0.78 | 0.0121                             |
| Body mass index                             | kg/m-squared              | 971                | 25.40 | 0.18 | 823   | 27.62 | 0.24 | <0.0001                            |
| Left-hand finger length ratio (Index:Ring)  | mm                        | 979                | 96.83 | 0.11 | 828   | 95.84 | 0.13 | <0.0001                            |
| Right-hand finger length ratio (Index:Ring) | mm                        | 979                | 96.48 | 0.12 | 828   | 95.70 | 0.12 | <0.0001                            |

1 – P-values are from analysis of variance model comparing mean values of putative risk factor across categories of race/ethnicity.

Supplementary e-Table 28: Age group variation in medical conditions among controls who do not have TMD.

| Putative risk factor                                | Category  | Age = 18-24 yrs |          | Age = 25-34 yrs |          | Age = 35-44 yrs |          | P-value <sup>1</sup> |
|-----------------------------------------------------|-----------|-----------------|----------|-----------------|----------|-----------------|----------|----------------------|
|                                                     |           | n               | column % | n               | column % | n               | column % |                      |
| History of 3 endocrine conditions <sup>2</sup>      | 1 or more | 19              | 2.3      | 13              | 2.9      | 18              | 5.3      | 0.0250               |
|                                                     | 0 [ref]   | 818             | 97.7     | 436             | 97.1     | 324             | 94.7     |                      |
| History of 7 cardiovascular conditions <sup>2</sup> | 1 or more | 22              | 2.6      | 18              | 4.0      | 36              | 10.6     | <0.0001              |
|                                                     | 0 [ref]   | 813             | 97.4     | 428             | 96.0     | 304             | 89.4     |                      |
| History of 3 hematologic conditions <sup>2</sup>    | 1 or more | 57              | 6.8      | 40              | 8.9      | 29              | 8.5      | 0.3429               |
|                                                     | 0 [ref]   | 779             | 93.2     | 408             | 91.1     | 313             | 91.5     |                      |
| History of 4 neural/sensory conditions <sup>2</sup> | 1 or more | 197             | 23.5     | 108             | 24.1     | 69              | 20.2     | 0.3755               |
|                                                     | 0 [ref]   | 640             | 76.5     | 341             | 75.9     | 273             | 79.8     |                      |
| History of 5 respiratory conditions <sup>2</sup>    | 1 or more | 323             | 38.6     | 188             | 42.0     | 115             | 33.6     | 0.0575               |
|                                                     | 0 [ref]   | 513             | 61.4     | 260             | 58.0     | 227             | 66.4     |                      |
| History of obstructive sleep apnea                  | yes       | 16              | 1.9      | 11              | 2.6      | 10              | 3.2      | 0.4428               |
|                                                     | no [ref]  | 808             | 98.1     | 418             | 97.4     | 304             | 96.8     |                      |
| History of osteoarthritis                           | yes       | 0               | 0.0      | 3               | 0.7      | 8               | 2.3      | <0.0001              |
|                                                     | no [ref]  | 837             | 100.0    | 446             | 99.3     | 333             | 97.7     |                      |
| History of rheumatoid arthritis                     | yes       | 0               | 0.0      | 1               | 0.2      | 6               | 1.8      | 0.0001               |
|                                                     | no [ref]  | 836             | 100.0    | 448             | 99.8     | 336             | 98.2     |                      |
| History of Sjogrens syndrome                        | yes       | 1               | 0.1      | 0               | 0.0      | 0               | 0.0      | 0.6232               |
|                                                     | no [ref]  | 836             | 99.9     | 449             | 100.0    | 342             | 100.0    |                      |

1 – P-values are from Chi-square test of association between putative risk factor and age.

2 – See Methods for the particular conditions included in this category.

Supplementary e-Table 29: Gender variation in medical conditions among controls who do not have TMD.

| Putative risk factor                                | Category  | Female |          | Male |          | P-value <sup>1</sup> |
|-----------------------------------------------------|-----------|--------|----------|------|----------|----------------------|
|                                                     |           | n      | column % | n    | column % |                      |
| History of 3 endocrine conditions <sup>2</sup>      | 1 or more | 40     | 4.3      | 10   | 1.4      | 0.0007               |
|                                                     | 0 [ref]   | 882    | 95.7     | 696  | 98.6     |                      |
| History of 7 cardiovascular conditions <sup>2</sup> | 1 or more | 52     | 5.6      | 24   | 3.4      | 0.0374               |
|                                                     | 0 [ref]   | 870    | 94.4     | 675  | 96.6     |                      |
| History of 3 hematologic conditions <sup>2</sup>    | 1 or more | 118    | 12.8     | 8    | 1.1      | <0.0001              |
|                                                     | 0 [ref]   | 805    | 87.2     | 695  | 98.9     |                      |
| History of 4 neural/sensory conditions <sup>2</sup> | 1 or more | 255    | 27.7     | 119  | 16.9     | <0.0001              |
|                                                     | 0 [ref]   | 667    | 72.3     | 587  | 83.1     |                      |
| History of 5 respiratory conditions <sup>2</sup>    | 1 or more | 414    | 45.0     | 212  | 30.1     | <0.0001              |
|                                                     | 0 [ref]   | 507    | 55.0     | 493  | 69.9     |                      |
| History of obstructive sleep apnea                  | yes       | 19     | 2.1      | 18   | 2.7      | 0.5088               |
|                                                     | no [ref]  | 869    | 97.9     | 661  | 97.3     |                      |
| History of osteoarthritis                           | yes       | 7      | 0.8      | 4    | 0.6      | 0.6398               |
|                                                     | no [ref]  | 915    | 99.2     | 701  | 99.4     |                      |
| History of rheumatoid arthritis                     | yes       | 5      | 0.5      | 2    | 0.3      | 0.4278               |
|                                                     | no [ref]  | 916    | 99.5     | 704  | 99.7     |                      |
| History of Sjogrens syndrome                        | yes       | 1      | 0.1      | 0    | 0.0      | 0.3813               |
|                                                     | no [ref]  | 921    | 99.9     | 706  | 100.0    |                      |

1 – P-values are from Chi-square test of association between putative risk factor and gender.

2 – See Methods for the particular conditions included in this category.

Supplementary e-Table 30: Racial/ethnic group variation in medical conditions among controls who do not have TMD.

| Putative risk factor                                | Category  | Non-Hispanic White |          | Other |          | P-value <sup>1</sup> |
|-----------------------------------------------------|-----------|--------------------|----------|-------|----------|----------------------|
|                                                     |           | n                  | column % | n     | column % |                      |
| History of 3 endocrine conditions <sup>2</sup>      | 1 or more | 28                 | 3.3      | 22    | 2.8      | 0.5097               |
|                                                     | 0 [ref]   | 809                | 96.7     | 769   | 97.2     |                      |
| History of 7 cardiovascular conditions <sup>2</sup> | 1 or more | 33                 | 4.0      | 43    | 5.5      | 0.1546               |
|                                                     | 0 [ref]   | 800                | 96.0     | 745   | 94.5     |                      |
| History of 3 hematologic conditions <sup>2</sup>    | 1 or more | 64                 | 7.6      | 62    | 7.9      | 0.8732               |
|                                                     | 0 [ref]   | 773                | 92.4     | 727   | 92.1     |                      |
| History of 4 neural/sensory conditions <sup>2</sup> | 1 or more | 221                | 26.4     | 153   | 19.3     | 0.0006               |
|                                                     | 0 [ref]   | 615                | 73.6     | 639   | 80.7     |                      |
| History of 5 respiratory conditions <sup>2</sup>    | 1 or more | 360                | 43.1     | 266   | 33.6     | <0.0001              |
|                                                     | 0 [ref]   | 475                | 56.9     | 525   | 66.4     |                      |
| History of obstructive sleep apnea                  | yes       | 18                 | 2.2      | 19    | 2.5      | 0.6444               |
|                                                     | no [ref]  | 803                | 97.8     | 727   | 97.5     |                      |
| History of osteoarthritis                           | yes       | 3                  | 0.4      | 8     | 1.0      | 0.1075               |
|                                                     | no [ref]  | 834                | 99.6     | 782   | 99.0     |                      |
| History of rheumatoid arthritis                     | yes       | 3                  | 0.4      | 4     | 0.5      | 0.6487               |
|                                                     | no [ref]  | 834                | 99.6     | 786   | 99.5     |                      |
| History of Sjogrens syndrome                        | yes       | 1                  | 0.1      | 0     | 0.0      | 0.3308               |
|                                                     | no [ref]  | 836                | 99.9     | 791   | 100.0    |                      |

1 – P-values are from Chi-square test of association between putative risk factor and racial/ethnic group.

2 – See Methods for the particular conditions included in this category.

Supplementary e-Table 31: Age group variation in health status variables among controls who do not have TMD.

| Putative risk factor                          | Category        | Age = 18-24 yrs |          | Age = 25-34 yrs |          | Age = 35-44 yrs |          | P-value <sup>1</sup> |
|-----------------------------------------------|-----------------|-----------------|----------|-----------------|----------|-----------------|----------|----------------------|
|                                               |                 | n               | column % | n               | column % | n               | column % |                      |
| Smoking history: current, former or never     | never [ref]     | 725             | 87.9     | 302             | 69.6     | 148             | 44.2     | <0.0001              |
|                                               | former          | 26              | 3.2      | 56              | 12.9     | 43              | 12.8     |                      |
|                                               | current         | 74              | 9.0      | 76              | 17.5     | 144             | 43.0     |                      |
| Self rated general health                     | fair/poor       | 23              | 2.8      | 24              | 5.4      | 30              | 8.7      | <0.0001              |
|                                               | good            | 413             | 49.5     | 235             | 52.8     | 202             | 58.7     |                      |
|                                               | excellent [ref] | 398             | 47.7     | 186             | 41.8     | 112             | 32.6     |                      |
| Ever hospitalized for surgery/serious illness | no [ref]        | 563             | 67.6     | 276             | 61.7     | 184             | 54.0     | <0.0001              |
|                                               | yes             | 270             | 32.4     | 171             | 38.3     | 157             | 46.0     |                      |
| Past use of 11 medications                    | 3 or more       | 102             | 12.3     | 85              | 19.0     | 52              | 15.1     | <0.0001              |
|                                               | 2               | 309             | 37.1     | 151             | 33.7     | 82              | 23.8     |                      |
|                                               | 1               | 258             | 31.0     | 116             | 25.9     | 99              | 28.8     |                      |
|                                               | 0 [ref]         | 163             | 19.6     | 96              | 21.4     | 111             | 32.3     |                      |

1 – P-values are from Chi-square test of association between putative risk factor and age.



Supplementary e-Table 32: Gender variation in health status variables among controls who do not have TMD.

| Putative risk factor                          | Category        | Female |          | Male |          | P-value <sup>1</sup> |
|-----------------------------------------------|-----------------|--------|----------|------|----------|----------------------|
|                                               |                 | n      | column % | n    | column % |                      |
| Smoking history: current, former or never     | never [ref]     | 691    | 76.9     | 484  | 69.6     | 0.0046               |
|                                               | former          | 64     | 7.1      | 61   | 8.8      |                      |
|                                               | current         | 144    | 16.0     | 150  | 21.6     |                      |
| Self rated general health                     | fair/poor       | 41     | 4.5      | 36   | 5.1      | 0.0016               |
|                                               | good            | 517    | 56.3     | 333  | 47.3     |                      |
|                                               | excellent [ref] | 361    | 39.3     | 335  | 47.6     |                      |
| Ever hospitalized for surgery/serious illness | no [ref]        | 571    | 62.1     | 452  | 64.5     | 0.3183               |
|                                               | yes             | 349    | 37.9     | 249  | 35.5     |                      |
| Past use of 11 medications                    | 3 or more       | 161    | 17.5     | 78   | 11.1     | <0.0001              |
|                                               | 2               | 322    | 35.0     | 220  | 31.2     |                      |
|                                               | 1               | 255    | 27.7     | 218  | 30.9     |                      |
|                                               | 0 [ref]         | 181    | 19.7     | 189  | 26.8     |                      |

1 – P-values are from Chi-square test of association between putative risk factor and gender.

Supplementary e-Table 33: Racial/ethnic group variation in health status variables among controls who do not have TMD.

| Putative risk factor                          | Category        | Non-Hispanic White |          | Other |          | P-value <sup>1</sup> |
|-----------------------------------------------|-----------------|--------------------|----------|-------|----------|----------------------|
|                                               |                 | n                  | column % | n     | column % |                      |
| Smoking history: current, former or never     | never [ref]     | 642                | 77.9     | 533   | 69.2     | <0.0001              |
|                                               | former          | 83                 | 10.1     | 42    | 5.5      |                      |
|                                               | current         | 99                 | 12.0     | 195   | 25.3     |                      |
| Self rated general health                     | fair/poor       | 15                 | 1.8      | 62    | 7.8      | <0.0001              |
|                                               | good            | 395                | 47.5     | 455   | 57.5     |                      |
|                                               | excellent [ref] | 422                | 50.7     | 274   | 34.6     |                      |
| Ever hospitalized for surgery/serious illness | no [ref]        | 471                | 56.5     | 552   | 70.1     | <0.0001              |
|                                               | yes             | 363                | 43.5     | 235   | 29.9     |                      |
| Past use of 11 medications                    | 3 or more       | 176                | 21.1     | 63    | 8.0      | <0.0001              |
|                                               | 2               | 359                | 43.0     | 183   | 23.2     |                      |
|                                               | 1               | 191                | 22.9     | 282   | 35.7     |                      |
|                                               | 0 [ref]         | 109                | 13.1     | 261   | 33.1     |                      |

1 – P-values are from Chi-square test of association between putative risk factor and racial/ethnic group.
